# Supplementary material for: Intestinal permeability is associated with aggravated inflammation and myofibroblast accumulation in Graves’ orbitopathy: the MicroGO study
Source: Front Endocrinol (Lausanne). 2023 Nov 30;14:1173481. doi: 10.3389/fendo.2023.1173481 (PMC10724020; doi:10.3389/fendo.2023.1173481)
Supplement: Supplementary file 2 [file DataSheet_1.xlsx]

## Sheet: Annotation template
Scan name	ROI (label)	Segment (Name/ Label)	Segment tags	ROI_ID	Scan_ID	ROI_Type	LBP high/low	Clinical_Score	ROI_Type
C	009	Geometric Segment		009	C	connective	high	score_4	connective
C	010	Geometric Segment		010	C	connective	low	score_3	connective
C	011	FABP4+	FABP4+	011	C	adipose	low	score_3	adipose
C	012	FABP4+	FABP4+	012	C	adipose	low	score_3	adipose
C	004	Geometric Segment		004	C	connective	low	score_2	connective
C	005	FABP4+	FABP4+	005	C	adipose	high	score_4	adipose
C	006	FABP4+	FABP4+	006	C	adipose	high	score_4	adipose
C	007	FABP4+	FABP4+	007	C	adipose	low	score_3	connective
C	008	FABP4+	FABP4+	008	C	adipose	high	score_4	adipose
B	001	FABP4+	FABP4+	001	B	adipose	high	score_4	adipose
B	002	FABP4+	FABP4+	002	B	adipose	high	score_4	adipose
B	003	FABP4+	FABP4+	003	B	adipose	high	score_4	connective
B	004	FABP4+	FABP4+	004	B	adipose	high	score_4	adipose
B	005	Geometric Segment		005	B	connective	high	score_4	adipose
B	006	FABP4+	FABP4+	006	B	adipose	low	score_0	adipose
B	007	FABP4+	FABP4+	007	B	adipose	low	score_0	adipose
B	008	FABP4+	FABP4+	008	B	adipose	low	score_3	adipose
B	009	FABP4+	FABP4+	009	B	adipose	low	score_0	adipose
B	010	Geometric Segment		010	B	connective	low	score_0	adipose
B	011	FABP4+	FABP4+	011	B	adipose	low	score_3	adipose
B	012	FABP4+	FABP4+	012	B	adipose	low	score_3	adipose
B	013	Geometric Segment		013	B	connective	low	score_3	adipose
A	001	FABP4+	FABP4+	001	A	adipose	high	score_2	adipose
A	002	FABP4+	FABP4+	002	A	adipose	high	score_2	adipose
A	003	FABP4+	FABP4+	003	A	adipose	high	score_2	connective
A	004	Geometric Segment		004	A	connective	high	score_2	adipose
A	005	FABP4+	FABP4+	005	A	adipose	low	score_2	adipose
A	006	FABP4+	FABP4+	006	A	adipose	high	score_1	adipose
A	007	FABP4+	FABP4+	007	A	adipose	high	score_1	adipose
A	008	Geometric Segment		008	A	connective	high	score_1	connective
A	009	FABP4+	FABP4+	009	A	adipose	high	score_1	adipose
A	010	FABP4+	FABP4+	010	A	adipose	low	score_2	adipose
A	011	FABP4+	FABP4+	011	A	adipose	low	score_2	connective
A	012	FABP4+	FABP4+	012	A	adipose	low	score_2	adipose
C	001	FABP4+	FABP4+	001	C	adipose	low	score_2	adipose
C	002	FABP4+	FABP4+	002	C	adipose	low	score_2	adipose
C	003	FABP4+	FABP4+	003	C	adipose	low	score_2	adipose

## Sheet: Probe Groups
#Target Group	#Analyte type	#CodeClass	Target name (display name)
All Targets;Tumor	RNA	Endogenous	AKT1	1
All Targets;M2 Macrophage;Myeloid Supression;Myeloid Activation;Macrophage;Myeloid	RNA	Endogenous	ARG1	2
All Targets;Tumor;Antigen Presentation	RNA	Endogenous	B2M	3
All Targets;DC	RNA	Endogenous	BATF3	4
All Targets;Tumor;Apoptosis	RNA	Endogenous	BCL2	5
All Targets;Cytokine & Chemokine Signaling	RNA	Endogenous	CCL5	6
All Targets;Proliferation	RNA	Endogenous	CCND1	7
All Targets;T cells;T cell Activation	RNA	Endogenous	CD27	8
All Targets;Myeloid Activation;Checkpoint	RNA	Endogenous	CD274	9
All Targets;Checkpoint	RNA	Endogenous	CD276	10
All Targets;T cells	RNA	Endogenous	CD3E	11
All Targets;T cells;Th cells;Myeloid	RNA	Endogenous	CD4	12
All Targets;Myeloid Activation;Myeloid	RNA	Endogenous	CD40	13
All Targets;T cells	RNA	Endogenous	CD40LG	14
All Targets;T cell Activation	RNA	Endogenous	CD44	15
All Targets;Myeloid	RNA	Endogenous	CD47	16
All Targets;Macrophage	RNA	Endogenous	CD68	17
All Targets;MHC2;Antigen Presentation	RNA	Endogenous	CD74	18
All Targets;T cell Activation;Myeloid;Checkpoint	RNA	Endogenous	CD86	19
All Targets;T cells;CD8 T cells	RNA	Endogenous	CD8A	20
All Targets;Cytokine & Chemokine Signaling	RNA	Endogenous	CMKLR1	21
All Targets;Myeloid Activation;Myeloid;Cytokine & Chemokine Signaling	RNA	Endogenous	CSF1R	22
All Targets;T cells;T cell Activation;Th cells;Checkpoint	RNA	Endogenous	CTLA4	23
All Targets;Tumor;Wnt Signaling	RNA	Endogenous	CTNNB1	24
All Targets;Cytokine & Chemokine Signaling	RNA	Endogenous	CXCL10	25
All Targets;Cytokine & Chemokine Signaling	RNA	Endogenous	CXCL9	26
All Targets;Cytokine & Chemokine Signaling	RNA	Endogenous	CXCR6	27
All Targets;Wnt Signaling	RNA	Endogenous	DKK2	28
All Targets;Tumor;Epithelial	RNA	Endogenous	EPCAM	29
All Targets;Apoptosis;Cytokine & Chemokine Signaling	RNA	Endogenous	FAS	30
All Targets;T cells;Th cells;Tregs	RNA	Endogenous	FOXP3	31
All Targets;T cell Activation;Cytotoxicity	RNA	Endogenous	GZMB	32
All Targets;T cells;T cell Activation;Checkpoint	RNA	Endogenous	HAVCR2	33
All Targets;Tumor;Cytokine & Chemokine Signaling	RNA	Endogenous	HIF1A	34
All Targets;MHC2;Antigen Presentation	RNA	Endogenous	HLA-DQ	35
All Targets;MHC2;Antigen Presentation	RNA	Endogenous	HLA-DRB	36
All Targets;Antigen Presentation	RNA	Endogenous	HLA-E	37
All Targets;Immune Cell Adhesion & Migration	RNA	Endogenous	ICAM1	38
All Targets;Myeloid;Checkpoint;B cells	RNA	Endogenous	ICOSLG	39
All Targets;Myeloid Supression;Myeloid	RNA	Endogenous	IDO1	40
All Targets;Interferon	RNA	Endogenous	IFNAR1	41
All Targets;Interferon	RNA	Endogenous	IFNG	42
All Targets;Interferon	RNA	Endogenous	IFNGR1	43
All Targets;Cytokine & Chemokine Signaling	RNA	Endogenous	IL12B	44
All Targets;Cytokine & Chemokine Signaling	RNA	Endogenous	IL15	45
All Targets;Cytokine & Chemokine Signaling	RNA	Endogenous	IL6	46
All Targets;Immune Cell Adhesion & Migration	RNA	Endogenous	ITGAM	47
All Targets;Immune Cell Adhesion & Migration	RNA	Endogenous	ITGAV	48
All Targets;Immune Cell Adhesion & Migration	RNA	Endogenous	ITGAX	49
All Targets;Immune Cell Adhesion & Migration	RNA	Endogenous	ITGB2	50
All Targets;Immune Cell Adhesion & Migration	RNA	Endogenous	ITGB8	51
All Targets;Tumor;Epithelial	RNA	Endogenous	KRT	52
All Targets;T cells;T cell Activation;Checkpoint	RNA	Endogenous	LAG3	53
All Targets;T cells;Myeloid	RNA	Endogenous	LY6E	54
All Targets;Proliferation	RNA	Endogenous	MKI67	55
All Targets;B cells	RNA	Endogenous	MS4A1	56
All Targets;Background	RNA	Negative	NegPrb1	57
All Targets;Background	RNA	Negative	NegPrb2	58
All Targets;Background	RNA	Negative	NegPrb3	59
All Targets;Background	RNA	Negative	NegPrb4	60
All Targets;Background	RNA	Negative	NegPrb5	61
All Targets;Background	RNA	Negative	NegPrb6	62
All Targets;Cytotoxicity	RNA	Endogenous	NKG7	63
All Targets;Reference Gene	RNA	Control	OAZ1	64
All Targets;Melanoma	RNA	Endogenous	pan-melanocyte	65
All Targets;T cells;T cell Activation;Checkpoint	RNA	Endogenous	PDCD1	66
All Targets;Checkpoint	RNA	Endogenous	PDCD1LG2	67
All Targets;Immune Cell Adhesion & Migration	RNA	Endogenous	PECAM1	68
All Targets;Reference Gene	RNA	Control	POLR2A	69
All Targets;Antigen Presentation	RNA	Endogenous	PSMB10	70
All Targets;Tumor	RNA	Endogenous	PTEN	71
All Targets;Total Immune	RNA	Endogenous	PTPRC	72
All Targets;Reference Gene	RNA	Control	RAB7A	73
All Targets;Reference Gene	RNA	Control	SDHA	74
All Targets;Cytokine & Chemokine Signaling	RNA	Endogenous	STAT1	75
All Targets;Cytokine & Chemokine Signaling	RNA	Endogenous	STAT2	76
All Targets;Cytokine & Chemokine Signaling	RNA	Endogenous	STAT3	77
All Targets;Th cells	RNA	Endogenous	TBX21	78
All Targets;T cells;Checkpoint	RNA	Endogenous	TIGIT	79
All Targets;Apoptosis;Cytokine & Chemokine Signaling	RNA	Endogenous	TNF	80
All Targets;T cells;T cell Activation	RNA	Endogenous	TNFRSF9	81
All Targets;Reference Gene	RNA	Control	UBB	82
All Targets;Cytokine & Chemokine Signaling	RNA	Endogenous	VEGFA	83
All Targets;Myeloid Activation;Macrophage;Myeloid;Checkpoint	RNA	Endogenous	VSIR	84

## Sheet: QC
Scan_ID	ROI_ID	AOI	Segment (Name/ Label)	ROI X Coordinate	ROI Y Coordinate	Segment tags	AOI surface area	AOI nuclei count	OAZ1	POLR2A	RAB7A	SDHA	UBB	NegPrb1	NegPrb2	NegPrb3	NegPrb4	NegPrb5	NegPrb6	AKT1	ARG1	B2M	BATF3	BCL2	CCL5	CCND1	CD27	CD274	CD276	CD3E	CD4	CD40	CD40LG	CD44	CD47	CD68	CD74	CD86	CD8A	CMKLR1	CSF1R	CTLA4	CTNNB1	CXCL10	CXCL9	CXCR6	DKK2	EPCAM	FAS
A	1	1	FABP4+	31761.6	78595.1	FABP4+	127211	89	38.92	20.5	33.3	44.43	67.91	26.66	11.58	22.14	21.12	14.02	60.69	41.92	16.02	113.39	27.85	27.1	17.99	15.8	14.88	53.97	18.68	18.75	41.49	22.44	22.57	23.06	18.41	53.41	79.08	29.96	25.4	22.07	12.61	22.1	36.43	25.22	21.87	19.26	40.98	13.25	13.84
A	2	1	FABP4+	34220.1	79088.4	FABP4+	137967	111	34.84	15.19	23.94	139.82	65.37	12.59	9.98	14.8	20.46	3.5	43.57	28.26	15.48	111.74	23.45	18.23	22.38	21.69	13.61	45.85	26.86	18.79	26.22	15.21	26.22	16.18	20.67	54.74	74.46	23.61	20.34	20.97	9.89	27.31	35.48	18.88	25.53	24.97	23.57	13.22	7.92
A	3	1	FABP4+	33037.8	70797.1	FABP4+	222849	109	74.05	51.65	49.19	51.08	141.67	38.06	16.38	47.5	54.97	24.52	166.13	80.64	42.81	151.95	51.44	32.96	51.21	34.2	28.62	174.26	47.9	48.08	57.97	34.38	40.92	49.54	25.76	84.25	142.2	44.02	53.95	35.93	26.85	48.9	68.94	44.1	42.8	37.82	48.43	18.53	24.97
A	4	1	Geometric Segment	34089	84480		169526	-1	57.58	51.99	52.79	42.75	65.24	47.51	26.21	43.67	64.94	23.89	70.9	50.05	54.43	122.35	61.54	47.95	29.8	59.75	27.39	76.04	45.61	45.78	70.16	38.53	74.5	43.22	48.69	69.53	111.9	56.63	37.58	63.64	19.54	107.92	52.15	39.57	40.16	41.16	87.78	17.82	15.36
A	5	1	FABP4+	37944.8	10042.7	FABP4+	227594	14	127.16	67.5	92.96	112.93	196.19	69.81	23.21	110.06	118.26	48.54	165.58	124.9	65.11	180.62	110.52	75.87	91.55	67.29	115.29	131.32	81.98	68.87	133.64	51.64	60.03	92.44	54.5	166.97	144.69	85.89	71.05	94.42	46.01	68.66	104.79	80.4	108.81	76.39	109.12	61.54	38.15
A	6	1	FABP4+	15249.1	30768.1	FABP4+	291049	157	232.18	108.1	150.31	178.7	481.95	102.49	55.77	143.48	148.04	55.24	227	177.92	108.21	355.79	140.81	102.65	111.7	144.24	127.75	208.78	165.92	112.82	195.01	104.05	90.91	119.37	92.66	285.43	273.12	136.22	145.21	114.44	55.27	138.35	222.05	126.94	159.75	107.22	146.58	73.92	62.49
A	7	1	FABP4+	9499.1	29135.7	FABP4+	298870	100	230.29	138.48	174.41	247.2	448.02	127.77	46.37	189.34	169.08	79.42	250.55	222.03	132.24	444	165.51	132.92	136.52	99.71	148.31	224.44	158.55	144.59	273.65	90.02	116.5	182	105.06	264.14	484.4	143.57	135.92	144.02	66.45	140.88	184.7	132.94	194.43	149.22	167.23	80.79	62.2
A	8	1	Geometric Segment	16008	52844		327876	-1	225.39	225.18	273.06	296.92	318.05	211.43	89.28	245.28	321.54	128.4	344.77	336.88	219.78	383.08	267.85	200.24	193.99	292.34	178.31	290.11	241.74	227.18	403.34	145.82	243.51	246.44	176.7	372.48	436.86	260.44	276.2	284.08	105.31	309.99	333.4	225.93	240.1	227.7	284.06	134.32	104.01
A	9	1	FABP4+	24954.7	33074.3	FABP4+	328357	140	245.4	145.29	217.06	263.7	482.89	139.22	55.51	140.6	179.49	94.17	253.56	201.32	131.51	375.86	165.81	118.62	122.7	154.5	116.37	206.23	143.95	127.04	246.84	119.19	139.59	151.16	126.35	262.25	379.71	138.31	148.3	146.63	71.4	147.68	234.88	139.47	174.49	131.64	171.73	86.34	74.26
A	10	1	FABP4+	30478.8	8864	FABP4+	199904	84	132.51	72.37	84.45	157.29	190.63	79.03	24.19	641.92	92.1	42.6	233.97	124.4	64.13	183.16	93.07	79.89	84.13	86.62	102.54	176.09	91.01	59.65	272.33	57.28	77.06	101.15	66.4	151.69	141.2	105.14	93.93	88.64	37.61	77.32	123.92	114.91	109.45	72.9	122.27	67.9	53.31
A	11	1	FABP4+	34517.3	12871.5	FABP4+	177797	0	72.07	69.12	60.53	110.3	127.82	54.24	26.38	89.49	74.22	32.44	161.13	107.4	60.07	141.53	67.79	52.02	81.18	55.36	76.82	99.15	72.81	61.23	127.88	49.66	73	62.94	37.96	122.9	121.72	70.89	108.89	78.89	27.89	67.25	111.8	60.87	85.93	53.27	86.8	37.3	36.38
A	12	1	FABP4+	29057.5	13657.5	FABP4+	170566	152	66.06	57.17	76.98	94.63	149.5	47.71	28	73.48	71.47	31.43	173.6	108.79	55.78	162.29	49.22	50.76	65.78	50.05	49.93	129.69	73.09	52.27	221.25	32.45	57.97	61.6	48.14	111.93	115.38	54.71	52.19	65.41	29.6	64.72	77.26	74.19	95.29	52.77	96.24	24.74	39.11
B	1	1	FABP4+	33798.7	79147.4	FABP4+	221076	678	135.37	68.46	80.46	84.25	326.69	51.36	22.92	87.67	28.34	37.54	80.96	106.11	44.76	307.75	50.48	66.29	41.69	45.19	34.66	61.8	52.63	60.69	76.37	45.75	74.19	101.54	61.86	153.86	259.54	56.89	46.3	72.49	39.82	57.55	77.43	92.69	157.65	55.61	57.23	40.65	48.35
B	2	1	FABP4+	21382	78766.9	FABP4+	212655	594	126.1	80.36	59.5	105.65	216.95	71.16	19.26	104.7	43.85	55.21	79.83	112.48	71.06	181.61	67.15	82.12	67.83	80.61	47.57	83.93	67.85	80.72	101.4	45.85	57.87	101.12	86.01	150.26	121.35	77.26	50.3	78.46	29.95	71.41	79.94	94.21	71.58	76.05	67.63	45.95	44.52
B	3	1	FABP4+	15160.2	62593.4	FABP4+	271627	362	137.94	70.7	94.6	130.29	333.01	61.32	22.64	142.49	75.55	46.84	160.19	111.33	72.7	234.37	58.45	101.6	87.1	76.9	55.45	139.85	79.69	106.84	151.3	56.51	61.62	114.03	101.02	137.65	145.9	90.99	79.29	87.48	36.42	69.56	93.28	125.77	115.5	78.99	94.75	70.29	32.15
B	4	1	FABP4+	20060.3	87587.9	FABP4+	284318	852	98.82	57.48	60.99	205.62	142.03	62.62	19.19	96.28	57.75	45.94	83.13	98.16	44.06	183.31	52.58	74.2	56.2	58.35	25.92	69.04	53.25	64.39	76.29	45.61	59.13	69.06	57.65	103.88	87.07	70.75	52.54	56.4	30.43	65.32	58.81	80.59	96.19	52.96	44.65	33.81	33.93
B	5	1	Geometric Segment	35825	70727		71021.5	-1	76.74	48.18	49.47	51.58	115.08	29.81	22.09	58.07	32.42	26.6	59.01	48.12	49.12	97.46	37.54	38.48	43.53	46.12	25.1	68.79	41.01	48.28	58.86	28.94	48.26	60.78	44.55	41.4	65.96	45.39	37.19	42.83	28.63	45.26	56.31	48.47	43.39	43.57	40.43	32.46	35.06
B	6	1	FABP4+	37961.8	44576.5	FABP4+	141282	334	159.89	61.8	108.01	154.06	299.64	72.7	39.4	175.68	62.34	59.55	122.48	107.12	59.28	262.65	79.42	100.63	100.36	108.78	93.12	92.25	127.52	72.21	184.65	62.06	84.97	144.98	86.59	158.93	133.48	112	67.99	116.9	50.62	82.74	118.61	137.86	181.41	90.99	111.31	74.66	59.05
B	7	1	FABP4+	35966.4	47023.1	FABP4+	130770	316	135.14	53.81	73.6	104.57	292.89	55.28	32.81	80.77	35.74	39.26	64.18	89.21	52.72	204.01	50.87	84.94	52.84	65.14	52.07	54.56	78.7	55.04	90.98	58.93	52.38	81.84	62.5	113.92	100.8	59.45	53.69	71.84	34.08	65.34	67.03	84.96	115.11	56.09	66.52	45.54	52.96
B	8	1	FABP4+	19223	15078.2	FABP4+	92816.9	489	110.86	66.56	80.97	167.65	221.43	58.73	12.67	124.12	56.02	39.19	76.72	100.72	53.22	195.93	72.84	77.07	54.66	68.13	63.04	60.87	71.93	60.27	116.77	47.54	65.62	77.83	77.77	140.19	174.47	85.77	78.42	51.67	23.01	70.25	77.73	80.69	121.54	66.97	70.57	59.6	36.58
B	9	1	FABP4+	14516.2	29644.5	FABP4+	159068	39	164.71	114.51	136.46	209.2	326.9	73.2	44.92	245.84	82.37	67.82	118.57	159.5	79.13	295.97	97.16	119.69	90.84	122.29	112.15	120.15	126.57	114.52	197.93	76.66	99.16	171.63	121.67	231.11	194.92	118.59	99.91	123.02	62.86	104.4	153.05	151.98	134.91	97.43	106.76	69.17	96.79
B	10	1	Geometric Segment	19033	42635		220293	-1	121.6	104.22	125.09	182.06	176.85	95.12	33.86	206.13	80.39	96.49	140.25	173.29	111.39	158.03	105.58	113.06	90.75	119.09	71.35	132.67	92.62	111.6	134.82	67.16	115.41	162.73	141.92	154.66	128.43	167.24	112.13	132.92	66.43	118.6	133.48	163.91	164.38	142.61	122.91	73.32	94.75
B	11	1	FABP4+	10156.6	11452.1	FABP4+	65183.3	153	107.59	70.06	75.36	95.15	166.47	55.59	26.16	136.93	49.99	41.66	92.41	66.06	53.98	155.05	65.44	66.53	71.93	58.62	54.87	67.98	72.08	76.31	112.21	38.64	58.22	95.81	87.22	115.79	148.66	67.3	55.1	75.12	36.16	72.53	69.08	80.67	132.59	64.61	62.81	33.29	49.38
B	12	1	FABP4+	23545.1	6772.3	FABP4+	102815	394	92.68	71.04	65.41	116.27	216.3	59.95	16.42	115.7	45.23	36.98	339.33	94.45	63.53	176.77	74.49	65.1	54.18	51.88	44.46	243.93	59.64	68.54	209.56	43.27	61.79	90.21	78.21	103.57	171.64	88.93	73.05	83.03	48.63	77.3	93.73	79.69	88.05	77.91	66.23	39.89	46.5
B	13	1	Geometric Segment	19115	10303		143409	-1	121.6	97.49	147	191.25	184.31	110.3	40.08	133.87	90.34	70.93	171.2	139.43	88.03	182.5	101.39	88.78	84.84	96.89	81.2	103.28	110.67	94.62	112.46	86.62	91.1	153.63	88.71	104.79	181.62	115.22	114.22	141.32	46.14	105.53	144.99	196.48	161.06	99.45	92.95	57.06	60.97
C	1	1	FABP4+	12314.9	74547	FABP4+	168318	159	110.77	44.6	56.49	78.33	237.64	51.1	21.25	44.59	47.03	28.28	74.26	78.56	47.28	141.87	68.67	64.03	41.27	59.18	34.21	71.45	67.73	39.08	70.82	43.95	62.99	47.78	56.34	55.4	137.85	77.71	48.13	71.02	22.47	52.44	84.77	53.51	47.52	53.14	54.86	31.35	31.75
C	2	1	FABP4+	11512.9	72496.3	FABP4+	153930	129	109.5	45.01	71.52	74.82	241.51	50.8	16.57	53.65	38.51	19.16	64.86	70.01	46.66	127.57	54.07	55	39.36	52.25	42.07	64.73	68.5	37.48	121.21	48.32	45.96	30.78	60.12	65.59	130.56	66.3	53.38	60.92	25.41	34.26	70.04	42.71	47.25	54.8	77.01	23.47	30.5
C	3	1	FABP4+	33945.9	81318.2	FABP4+	130633	268	6.98	6.08	11.01	19.46	30	7.4	5.63	9.04	3.34	6.78	31.48	18.58	5.12	17.33	10.82	4.17	11.83	11.1	4.86	7.89	8.68	5.82	6.48	2.18	6.36	5.45	9.82	11.27	18.26	4.54	4.43	8.82	3.72	8.85	11.65	3.13	5.9	4.31	10.12	6.23	4.98
C	4	1	Geometric Segment	29374	80685		176453	-1	101.9	51.31	77.25	96.65	186.53	68.35	26.66	53.4	66.94	23.75	74.53	95.25	53.29	140.39	41.72	48.8	53.6	103.84	38.95	72.82	54.43	43.26	94.91	64.46	75.64	58.09	78.78	60.59	103.59	72.53	71.04	86.27	36.28	59.15	92.84	67.08	69.05	55.23	64.21	34.71	33.3
C	6	1	FABP4+	31860.8	39635.5	FABP4+	116298	0	112.16	51.12	58.27	81.07	195.82	58.49	12.42	52.13	44.18	18.24	50.93	69.97	37.18	100.06	46.99	41.72	47.32	60.05	37.7	54.35	66.41	31.98	76.25	30.82	43.68	42.12	48.53	56.96	107.43	44.53	55.22	63.42	27.37	60.15	60.09	64.39	59.03	59.58	62.3	21.07	26.37
C	8	1	FABP4+	27109.6	37933.1	FABP4+	77052.3	30	56.51	22.08	30.4	63.59	135.77	45.57	12.44	32.97	31.34	20.34	55.43	64.67	31.14	77.43	36.77	33.41	38.33	36.77	33.26	39.83	55.16	23.59	58.31	33.77	24.61	23.21	26.04	33.7	84.37	30.94	31.31	33.57	22.61	31.5	42.56	46.65	39.12	29.76	34.41	22.37	21.1
C	9	1	Geometric Segment	19110.4	37848.9		306624	-1	242.41	126.04	219.5	236.1	609.7	212.15	64.6	190.59	140.89	83.45	228.53	255.87	156.8	437.28	166.89	183.18	129.58	212.48	138.65	188.98	209.11	165	305.33	145.97	216.37	120.82	221.47	183.38	412.01	203.29	172.61	212.14	103.33	169.35	291.4	178.98	185.05	162.4	155.31	112.07	120.43
C	10	1	Geometric Segment	19006	17200		130562	-1	58.14	51.76	74.06	91.22	89.67	67.67	27.95	97.75	58.91	38.48	87.9	87.13	68.78	92.96	61.5	72.48	46.98	83.23	56.77	77.07	63.47	48.19	99.08	51.78	79.57	50.65	60.67	82.67	102.56	68.47	73.27	60.55	29.77	79.17	69.19	56.06	78.14	83.21	79.89	39.52	38.47
C	12	1	FABP4+	21803.3	12988.7	FABP4+	195004	228	135.43	66.96	93.16	151.33	287.76	64.28	36.66	118.74	63.39	41.01	103.56	122.02	57.47	198.28	76.76	70.17	83.02	108.37	70.61	97.83	82.46	52.68	134.65	61.61	73.68	67.57	71.41	79.9	178.38	82.97	87.46	103.18	48.47	69.36	105.99	70.43	89.68	60.81	87.05	35.5	41.45
[truncated: 43 more columns]

## Sheet: Area
Scan_ID	ROI_ID	AOI	Segment (Name/ Label)	ROI X Coordinate	ROI Y Coordinate	Segment tags	AOI surface area	AOI nuclei count	OAZ1	POLR2A	RAB7A	SDHA	UBB	NegPrb1	NegPrb2	NegPrb3	NegPrb4	NegPrb5	NegPrb6	AKT1	ARG1	B2M	BATF3	BCL2	CCL5	CCND1	CD27	CD274	CD276	CD3E	CD4	CD40	CD40LG	CD44	CD47	CD68	CD74	CD86	CD8A	CMKLR1	CSF1R	CTLA4	CTNNB1	CXCL10	CXCL9	CXCR6	DKK2	EPCAM	FAS
A	1	1	FABP4+	31761.6	78595.1	FABP4+	127211	89	51.63	27.2	44.18	58.94	90.09	35.37	15.37	29.37	28.02	18.6	80.51	55.61	21.26	150.42	36.95	35.95	23.86	20.96	19.74	71.59	24.78	24.87	55.04	29.77	29.95	30.6	24.42	70.85	104.9	39.74	33.69	29.28	16.72	29.32	48.32	33.46	29.01	25.55	54.37	17.57	18.37
A	2	1	FABP4+	34220.1	79088.4	FABP4+	137967	111	42.61	18.58	29.29	171.03	79.96	15.4	12.2	18.11	25.03	4.28	53.29	34.57	18.93	136.68	28.68	22.3	27.38	26.53	16.65	56.09	32.85	22.98	32.07	18.61	32.07	19.79	25.29	66.95	91.07	28.87	24.87	25.66	12.09	33.4	43.4	23.09	31.23	30.54	28.83	16.17	9.68
A	3	1	FABP4+	33037.8	70797.1	FABP4+	222849	109	56.08	39.11	37.25	38.68	107.28	28.82	12.41	35.97	41.63	18.57	125.81	61.07	32.42	115.06	38.95	24.96	38.78	25.9	21.67	131.96	36.28	36.41	43.89	26.03	30.99	37.52	19.5	63.8	107.68	33.34	40.85	27.21	20.33	37.03	52.21	33.4	32.41	28.64	36.68	14.03	18.91
A	4	1	Geometric Segment	34089	84480		169526	-1	57.32	51.76	52.55	42.56	64.94	47.29	26.09	43.47	64.65	23.78	70.58	49.82	54.18	121.8	61.26	47.73	29.67	59.47	27.27	75.69	45.41	45.57	69.84	38.36	74.16	43.02	48.47	69.22	111.39	56.38	37.41	63.35	19.45	107.43	51.92	39.39	39.98	40.97	87.38	17.73	15.29
A	5	1	FABP4+	37944.8	10042.7	FABP4+	227594	14	94.29	50.05	68.92	83.74	145.47	51.76	17.21	81.61	87.69	35.99	122.78	92.61	48.28	133.93	81.95	56.25	67.88	49.9	85.49	97.37	60.79	51.07	99.09	38.29	44.51	68.54	40.41	123.8	107.28	63.68	52.68	70.01	34.12	50.91	77.7	59.62	80.68	56.64	80.91	45.63	28.29
A	6	1	FABP4+	15249.1	30768.1	FABP4+	291049	157	134.62	62.68	87.15	103.61	279.45	59.42	32.33	83.19	85.83	32.03	131.62	103.16	62.74	206.29	81.64	59.52	64.77	83.63	74.07	121.05	96.2	65.41	113.07	60.33	52.71	69.21	53.72	165.5	158.36	78.98	84.2	66.36	32.05	80.22	128.75	73.6	92.63	62.17	84.99	42.86	36.23
A	7	1	FABP4+	9499.1	29135.7	FABP4+	298870	100	130.03	78.19	98.48	139.58	252.97	72.15	26.18	106.91	95.47	44.85	141.47	125.37	74.67	250.71	93.46	75.05	77.09	56.3	83.74	126.73	89.52	81.64	154.51	50.83	65.78	102.77	59.32	149.14	273.51	81.06	76.74	81.32	37.52	79.55	104.29	75.06	109.78	84.26	94.42	45.62	35.12
A	8	1	Geometric Segment	16008	52844		327876	-1	116.01	115.9	140.54	152.82	163.7	108.82	45.95	126.24	165.5	66.08	177.45	173.39	113.12	197.17	137.86	103.06	99.84	150.47	91.78	149.32	124.42	116.93	207.6	75.05	125.33	126.84	90.95	191.71	224.85	134.05	142.16	146.21	54.2	159.55	171.6	116.29	123.58	117.2	146.2	69.13	53.53
A	9	1	FABP4+	24954.7	33074.3	FABP4+	328357	140	126.12	74.67	111.56	135.53	248.17	71.55	28.53	72.26	92.25	48.4	130.31	103.47	67.59	193.17	85.22	60.96	63.06	79.4	59.81	105.99	73.98	65.29	126.86	61.26	71.74	77.69	64.94	134.78	195.15	71.08	76.22	75.36	36.7	75.9	120.71	71.68	89.68	67.66	88.26	44.37	38.16
A	10	1	FABP4+	30478.8	8864	FABP4+	199904	84	111.86	61.1	71.29	132.78	160.93	66.72	20.42	541.9	77.75	35.96	197.51	105.02	54.14	154.62	78.56	67.44	71.02	73.13	86.56	148.65	76.83	50.36	229.9	48.36	65.05	85.38	56.06	128.05	119.2	88.76	79.29	74.83	31.75	65.27	104.61	97	92.4	61.54	103.22	57.32	45
A	11	1	FABP4+	34517.3	12871.5	FABP4+	177797	0	68.41	65.61	57.45	104.69	121.32	51.48	25.04	84.94	70.45	30.79	152.94	101.94	57.02	134.34	64.35	49.38	77.05	52.55	72.91	94.11	69.11	58.12	121.38	47.13	69.29	59.74	36.03	116.65	115.53	67.29	103.35	74.88	26.47	63.83	106.12	57.78	81.56	50.56	82.38	35.41	34.53
A	12	1	FABP4+	29057.5	13657.5	FABP4+	170566	152	65.36	56.56	76.16	93.63	147.91	47.21	27.7	72.7	70.71	31.1	171.76	107.64	55.19	160.57	48.69	50.23	65.08	49.52	49.4	128.31	72.32	51.72	218.9	32.1	57.36	60.95	47.63	110.74	114.15	54.13	51.63	64.72	29.29	64.03	76.44	73.4	94.28	52.21	95.22	24.48	38.7
B	1	1	FABP4+	33798.7	79147.4	FABP4+	221076	678	103.34	52.26	61.42	64.31	249.38	39.2	17.5	66.92	21.63	28.65	61.8	80.99	34.16	234.92	38.54	50.6	31.82	34.5	26.46	47.17	40.17	46.32	58.3	34.92	56.63	77.51	47.22	117.44	198.11	43.43	35.35	55.34	30.4	43.93	59.11	70.75	120.34	42.45	43.68	31.03	36.91
B	2	1	FABP4+	21382	78766.9	FABP4+	212655	594	100.07	63.77	47.21	83.84	172.17	56.47	15.29	83.09	34.8	43.81	63.35	89.26	56.39	144.12	53.29	65.17	53.83	63.97	37.75	66.6	53.84	64.06	80.47	36.39	45.92	80.25	68.25	119.24	96.3	61.31	39.92	62.27	23.77	56.67	63.44	74.76	56.81	60.35	53.67	36.47	35.33
B	3	1	FABP4+	15160.2	62593.4	FABP4+	271627	362	85.7	43.92	58.78	80.95	206.89	38.09	14.07	88.52	46.94	29.1	99.52	69.17	45.17	145.61	36.32	63.12	54.11	47.77	34.45	86.89	49.51	66.38	94	35.11	38.28	70.84	62.76	85.52	90.65	56.53	49.26	54.35	22.63	43.21	57.95	78.14	71.76	49.08	58.86	43.67	19.97
B	4	1	FABP4+	20060.3	87587.9	FABP4+	284318	852	58.65	34.11	36.2	122.05	84.3	37.17	11.39	57.15	34.28	27.26	49.34	58.26	26.15	108.8	31.21	44.04	33.36	34.63	15.39	40.98	31.6	38.22	45.28	27.07	35.1	40.99	34.22	61.66	51.68	41.99	31.18	33.47	18.06	38.77	34.91	47.83	57.09	31.43	26.5	20.07	20.14
B	5	1	Geometric Segment	35825	70727		71021.5	-1	182.35	114.48	117.55	122.56	273.46	70.84	52.49	137.97	77.04	63.2	140.21	114.34	116.71	231.57	89.21	91.44	103.43	109.58	59.64	163.46	97.44	114.72	139.86	68.77	114.67	144.43	105.87	98.38	156.74	107.84	88.38	101.76	68.03	107.55	133.79	115.17	103.1	103.53	96.06	77.13	83.3
B	6	1	FABP4+	37961.8	44576.5	FABP4+	141282	334	190.98	73.82	129.02	184.02	357.91	86.83	47.06	209.85	74.46	71.13	146.3	127.95	70.81	313.72	94.86	120.2	119.88	129.93	111.23	110.19	152.31	86.25	220.56	74.12	101.49	173.18	103.43	189.83	159.44	133.78	81.21	139.64	60.46	98.83	141.67	164.67	216.69	108.68	132.95	89.18	70.53
B	7	1	FABP4+	35966.4	47023.1	FABP4+	130770	316	174.39	69.44	94.98	134.95	377.97	71.33	42.34	104.24	46.13	50.67	82.82	115.12	68.03	263.27	65.65	109.61	68.19	84.06	67.2	70.41	101.56	71.03	117.4	76.05	67.59	105.61	80.65	147.02	130.08	76.72	69.29	92.7	43.98	84.32	86.5	109.63	148.54	72.38	85.84	58.76	68.34
B	8	1	FABP4+	19223	15078.2	FABP4+	92816.9	489	201.56	121.01	147.22	304.82	402.6	106.79	23.04	225.68	101.85	71.26	139.49	183.12	96.75	356.23	132.44	140.13	99.39	123.88	114.61	110.67	130.79	109.58	212.31	86.44	119.3	141.51	141.4	254.88	317.21	155.94	142.58	93.95	41.84	127.72	141.33	146.72	220.98	121.77	128.3	108.36	66.5
B	9	1	FABP4+	14516.2	29644.5	FABP4+	159068	39	174.74	121.48	144.77	221.94	346.81	77.66	47.66	260.81	87.38	71.95	125.79	169.21	83.95	313.99	103.07	126.98	96.38	129.73	118.98	127.47	134.28	121.5	209.99	81.32	105.2	182.08	129.08	245.18	206.8	125.81	106	130.52	66.68	110.76	162.37	161.24	143.13	103.36	113.26	73.38	102.68
B	10	1	Geometric Segment	19033	42635		220293	-1	93.15	79.83	95.82	139.47	135.48	72.87	25.94	157.91	61.58	73.92	107.44	132.74	85.33	121.06	80.88	86.61	69.52	91.23	54.66	101.63	70.95	85.49	103.28	51.44	88.41	124.66	108.72	118.48	98.38	128.12	85.9	101.82	50.89	90.85	102.26	125.56	125.92	109.24	94.16	56.17	72.58
B	11	1	FABP4+	10156.6	11452.1	FABP4+	65183.3	153	278.55	181.39	195.09	246.34	430.98	143.91	67.74	354.5	129.43	107.84	239.25	171.03	139.75	401.4	169.41	172.24	186.23	151.77	142.07	175.98	186.62	197.57	290.51	100.04	150.72	248.05	225.81	299.77	384.88	174.23	142.65	194.49	93.61	187.76	178.84	208.85	343.26	167.27	162.6	86.18	127.85
B	12	1	FABP4+	23545.1	6772.3	FABP4+	102815	394	152.12	116.6	107.36	190.84	355.02	98.4	26.96	189.91	74.23	60.7	556.96	155.02	104.27	290.15	122.26	106.85	88.93	85.16	72.97	400.37	97.89	112.49	343.95	71.01	101.42	148.06	128.37	169.99	281.73	145.97	119.91	136.29	79.82	126.88	153.85	130.79	144.53	127.88	108.71	65.47	76.32
B	13	1	Geometric Segment	19115	10303		143409	-1	143.09	114.72	172.99	225.05	216.88	129.8	47.17	157.53	106.31	83.47	201.46	164.07	103.59	214.75	119.31	104.47	99.83	114.02	95.55	121.53	130.23	111.34	132.34	101.93	107.2	180.79	104.38	123.31	213.72	135.59	134.41	166.3	54.29	124.19	170.62	231.2	189.52	117.03	109.38	67.14	71.74
C	1	1	FABP4+	12314.9	74547	FABP4+	168318	159	111.06	44.72	56.64	78.53	238.26	51.23	21.3	44.71	47.15	28.35	74.45	78.76	47.4	142.24	68.85	64.19	41.38	59.34	34.3	71.63	67.91	39.18	71.01	44.06	63.15	47.9	56.49	55.55	138.21	77.91	48.26	71.21	22.53	52.58	84.99	53.65	47.65	53.28	55	31.43	31.84
C	2	1	FABP4+	11512.9	72496.3	FABP4+	153930	129	120.04	49.35	78.41	82.03	264.77	55.7	18.17	58.82	42.22	21.01	71.1	76.75	51.15	139.86	59.28	60.3	43.16	57.28	46.12	70.97	75.09	41.09	132.89	52.98	50.38	33.75	65.91	71.9	143.13	72.69	58.52	66.79	27.86	37.56	76.78	46.82	51.8	60.08	84.42	25.73	33.43
C	3	1	FABP4+	33945.9	81318.2	FABP4+	130633	268	9.01	7.86	14.22	25.13	38.75	9.56	7.27	11.68	4.31	8.76	40.67	24.01	6.62	22.38	13.97	5.39	15.28	14.33	6.27	10.19	11.22	7.52	8.37	2.82	8.22	7.04	12.69	14.57	23.59	5.87	5.72	11.4	4.81	11.43	15.05	4.04	7.63	5.57	13.08	8.05	6.44
C	4	1	Geometric Segment	29374	80685		176453	-1	97.46	49.07	73.88	92.43	178.39	65.37	25.5	51.07	64.02	22.71	71.28	91.09	50.97	134.27	39.9	46.67	51.26	99.31	37.25	69.64	52.05	41.38	90.77	61.65	72.34	55.56	75.35	57.95	99.07	69.37	67.94	82.51	34.7	56.57	88.79	64.15	66.04	52.82	61.4	33.19	31.85
C	6	1	FABP4+	31860.8	39635.5	FABP4+	116298	0	162.75	74.17	84.55	117.64	284.14	84.87	18.02	75.64	64.1	26.47	73.9	101.52	53.95	145.2	68.18	60.53	68.66	87.13	54.71	78.87	96.36	46.4	110.65	44.73	63.38	61.11	70.42	82.65	155.88	64.61	80.13	92.03	39.71	87.28	87.19	93.44	85.65	86.46	90.4	30.58	38.27
C	8	1	FABP4+	27109.6	37933.1	FABP4+	77052.3	30	123.77	48.36	66.57	139.27	297.35	99.81	27.24	72.2	68.64	44.54	121.39	141.64	68.2	169.58	80.53	73.18	83.96	80.54	72.84	87.24	120.82	51.67	127.7	73.96	53.9	50.84	57.03	73.82	184.78	67.77	68.57	73.52	49.53	68.99	93.22	102.16	85.69	65.18	75.37	48.99	46.2
C	9	1	Geometric Segment	19110.4	37848.9		306624	-1	133.42	69.37	120.8	129.94	335.56	116.76	35.55	104.89	77.54	45.93	125.78	140.82	86.3	240.66	91.85	100.81	71.32	116.94	76.31	104.01	115.09	90.81	168.04	80.34	119.08	66.49	121.89	100.93	226.76	111.89	95	116.76	56.87	93.2	160.38	98.5	101.85	89.38	85.48	61.68	66.28
C	10	1	Geometric Segment	19006	17200		130562	-1	75.15	66.91	95.72	117.9	115.9	87.47	36.12	126.35	76.14	49.74	113.62	112.62	88.9	120.15	79.49	93.68	60.72	107.58	73.38	99.61	82.03	62.29	128.06	66.93	102.85	65.47	78.42	106.86	132.56	88.5	94.7	78.26	38.47	102.34	89.43	72.47	100.99	107.55	103.26	51.08	49.72
C	12	1	FABP4+	21803.3	12988.7	FABP4+	195004	228	117.2	57.94	80.62	130.96	249.02	55.63	31.73	102.76	54.86	35.49	89.62	105.6	49.74	171.59	66.43	60.73	71.84	93.78	61.11	84.66	71.36	45.59	116.53	53.31	63.76	58.47	61.8	69.14	154.37	71.8	75.69	89.29	41.95	60.02	91.72	60.95	77.61	52.63	75.33	30.72	35.87
[truncated: 43 more columns]

## Sheet: HK
Scan_ID	ROI_ID	AOI	Segment (Name/ Label)	ROI X Coordinate	ROI Y Coordinate	Segment tags	AOI surface area	AOI nuclei count	OAZ1	POLR2A	RAB7A	SDHA	UBB	NegPrb1	NegPrb2	NegPrb3	NegPrb4	NegPrb5	NegPrb6	AKT1	ARG1	B2M	BATF3	BCL2	CCL5	CCND1	CD27	CD274	CD276	CD3E	CD4	CD40	CD40LG	CD44	CD47	CD68	CD74	CD86	CD8A	CMKLR1	CSF1R	CTLA4	CTNNB1	CXCL10	CXCL9	CXCR6	DKK2	EPCAM	FAS
A	1	1	FABP4+	31761.6	78595.1	FABP4+	127211	89	119.02	62.69	101.84	135.88	207.68	81.54	35.42	67.7	64.59	42.89	185.59	128.19	49	346.77	85.18	82.87	55	48.33	45.5	165.03	57.12	57.33	126.89	68.63	69.03	70.53	56.3	163.33	241.83	91.62	77.67	67.5	38.55	67.6	111.4	77.12	66.88	58.9	125.34	40.51	42.34
A	2	1	FABP4+	34220.1	79088.4	FABP4+	137967	111	98.99	43.15	68.03	397.29	185.75	35.78	28.34	42.06	58.14	9.94	123.8	80.31	43.97	317.5	66.63	51.81	63.6	61.63	38.69	130.29	76.31	53.38	74.49	43.22	74.49	45.97	58.74	155.53	211.56	67.07	57.78	59.6	28.09	77.59	100.82	53.65	72.55	70.95	66.98	37.57	22.5
A	3	1	FABP4+	33037.8	70797.1	FABP4+	222849	109	128.53	89.64	85.38	88.65	245.9	66.05	28.44	82.45	95.41	42.57	288.36	139.97	74.3	263.73	89.28	57.22	88.88	59.36	49.68	302.46	83.15	83.46	100.61	59.67	71.02	85.99	44.7	146.23	246.81	76.41	93.64	62.36	46.6	84.88	119.67	76.55	74.28	65.65	84.06	32.17	43.34
A	4	1	Geometric Segment	34089	84480		169526	-1	125.22	113.08	114.8	92.98	141.89	103.31	57	94.97	141.23	51.96	154.2	108.84	118.38	266.09	133.83	104.28	64.81	129.93	59.57	165.36	99.2	99.57	152.57	83.8	162.02	94	105.9	151.22	243.36	123.16	81.72	138.39	42.49	234.69	113.42	86.06	87.35	89.51	190.89	38.75	33.41
A	5	1	FABP4+	37944.8	10042.7	FABP4+	227594	14	132.17	70.15	96.62	117.38	203.92	72.56	24.13	114.4	122.92	50.45	172.11	129.83	67.68	187.74	114.87	78.86	95.16	69.95	119.84	136.49	85.22	71.59	138.9	53.67	62.39	96.08	56.65	173.55	150.39	89.27	73.85	98.14	47.82	71.37	108.92	83.57	113.1	79.4	113.42	63.96	39.65
A	6	1	FABP4+	15249.1	30768.1	FABP4+	291049	157	134.81	62.77	87.28	103.76	279.84	59.51	32.38	83.31	85.96	32.08	131.8	103.31	62.83	206.58	81.76	59.6	64.86	83.75	74.18	121.23	96.34	65.51	113.23	60.41	52.79	69.31	53.8	165.73	158.59	79.1	84.32	66.45	32.09	80.33	128.93	73.7	92.76	62.26	85.11	42.92	36.28
A	7	1	FABP4+	9499.1	29135.7	FABP4+	298870	100	117.66	70.75	89.11	126.3	228.9	65.28	23.69	96.73	86.39	40.58	128.01	113.44	67.56	226.85	84.56	67.91	69.75	50.94	75.77	114.67	81	73.87	139.81	45.99	59.52	92.99	53.68	134.95	247.48	73.35	69.44	73.58	33.95	71.98	94.37	67.92	99.33	76.24	85.44	41.28	31.78
A	8	1	Geometric Segment	16008	52844		327876	-1	99.04	98.95	119.99	130.47	139.76	92.91	39.23	107.78	141.3	56.42	151.5	148.04	96.58	168.34	117.7	87.99	85.25	128.47	78.36	127.49	106.23	99.83	177.24	64.08	107.01	108.29	77.65	163.68	191.97	114.45	121.37	124.83	46.27	136.22	146.51	99.28	105.51	100.06	124.82	59.03	45.71
A	9	1	FABP4+	24954.7	33074.3	FABP4+	328357	140	114.13	67.57	100.95	122.65	224.58	64.75	25.82	65.39	83.48	43.8	117.93	93.63	61.16	174.81	77.12	55.17	57.06	71.85	54.12	95.91	66.95	59.08	114.8	55.43	64.92	70.3	58.76	121.97	176.6	64.33	68.97	68.2	33.21	68.68	109.24	64.87	81.15	61.23	79.87	40.16	34.54
A	10	1	FABP4+	30478.8	8864	FABP4+	199904	84	129.26	70.6	82.37	153.42	185.95	77.09	23.6	626.16	89.84	41.55	228.22	121.34	62.56	178.67	90.78	77.93	82.07	84.5	100.02	171.76	88.77	58.19	265.64	55.88	75.16	98.66	64.77	147.96	137.74	102.56	91.62	86.47	36.68	75.42	120.88	112.08	106.76	71.11	119.27	66.23	52
A	11	1	FABP4+	34517.3	12871.5	FABP4+	177797	0	99.62	95.54	83.66	152.45	176.67	74.97	36.47	123.69	102.58	44.84	222.71	148.44	83.03	195.62	93.7	71.9	112.21	76.52	106.17	137.04	100.64	84.63	176.75	68.63	100.9	86.99	52.46	169.87	168.23	97.98	150.5	109.04	38.55	92.95	154.53	84.14	118.77	73.63	119.97	51.56	50.28
A	12	1	FABP4+	29057.5	13657.5	FABP4+	170566	152	91.91	79.54	107.1	131.67	208.01	66.39	38.96	102.24	99.44	43.73	241.55	151.37	77.61	225.81	68.48	70.63	91.52	69.65	69.47	180.45	101.7	72.73	307.85	45.15	80.67	85.71	66.98	155.74	160.54	76.13	72.61	91.01	41.18	90.05	107.5	103.23	132.58	73.42	133.9	34.43	54.42
B	1	1	FABP4+	33798.7	79147.4	FABP4+	221076	678	136.57	69.07	81.17	84.99	329.57	51.81	23.12	88.44	28.59	37.87	81.67	107.04	45.15	310.46	50.93	66.87	42.06	45.59	34.96	62.34	53.09	61.22	77.04	46.15	74.84	102.43	62.4	155.21	261.82	57.39	46.71	73.13	40.17	58.05	78.11	93.5	159.03	56.1	57.73	41.01	48.78
B	2	1	FABP4+	21382	78766.9	FABP4+	212655	594	137.68	87.74	64.96	115.36	236.89	77.7	21.03	114.32	47.88	60.28	87.16	122.82	77.59	198.3	73.32	89.67	74.07	88.01	51.94	91.64	74.09	88.14	110.72	50.06	63.19	110.42	93.91	164.07	132.5	84.36	54.92	85.67	32.7	77.97	87.29	102.86	78.16	83.04	73.85	50.18	48.61
B	3	1	FABP4+	15160.2	62593.4	FABP4+	271627	362	121.76	62.4	83.5	115	293.93	54.12	19.99	125.77	66.68	41.34	141.39	98.26	64.17	206.86	51.59	89.68	76.88	67.87	48.94	123.44	70.34	94.31	133.55	49.88	54.38	100.64	89.16	121.5	128.78	80.31	69.98	77.21	32.15	61.39	82.33	111.01	101.94	69.72	83.63	62.04	28.38
B	4	1	FABP4+	20060.3	87587.9	FABP4+	284318	852	114.84	66.8	70.88	238.96	165.06	72.77	22.3	111.9	67.11	53.38	96.61	114.08	51.2	213.04	61.1	86.23	65.31	67.81	30.13	80.24	61.88	74.83	88.67	53.01	68.72	80.26	67	120.73	101.19	82.22	61.06	65.54	35.36	75.92	68.35	93.66	111.79	61.55	51.9	39.29	39.43
B	5	1	Geometric Segment	35825	70727		71021.5	-1	139.36	87.49	89.84	93.67	208.99	54.14	40.12	105.45	58.88	48.3	107.16	87.38	89.2	176.98	68.18	69.89	79.05	83.75	45.58	124.93	74.47	87.68	106.89	52.56	87.64	110.38	80.91	75.19	119.79	82.42	67.55	77.77	51.99	82.2	102.25	88.02	78.8	79.13	73.41	58.95	63.66
B	6	1	FABP4+	37961.8	44576.5	FABP4+	141282	334	135.38	52.33	91.46	130.45	253.72	61.55	33.36	148.76	52.78	50.43	103.71	90.71	50.2	222.39	67.24	85.21	84.98	92.1	78.85	78.11	107.97	61.14	156.35	52.55	71.94	122.76	73.32	134.57	113.02	94.84	57.57	98.99	42.86	70.06	100.43	116.73	153.61	77.04	94.25	63.22	50
B	7	1	FABP4+	35966.4	47023.1	FABP4+	130770	316	142.6	56.78	77.66	110.35	309.07	58.33	34.62	85.23	37.72	41.43	67.73	94.14	55.63	215.27	53.68	89.63	55.76	68.74	54.95	57.57	83.04	58.08	96	62.19	55.27	86.35	65.95	120.22	106.37	62.73	56.66	75.8	35.96	68.95	70.73	89.65	121.46	59.19	70.19	48.05	55.88
B	8	1	FABP4+	19223	15078.2	FABP4+	92816.9	489	110.12	66.11	80.43	166.53	219.95	58.34	12.59	123.29	55.64	38.93	76.21	100.04	52.86	194.61	72.35	76.56	54.3	67.68	62.61	60.46	71.45	59.86	115.99	47.22	65.17	77.31	77.25	139.25	173.3	85.19	77.89	51.33	22.86	69.77	77.21	80.15	120.73	66.52	70.09	59.2	36.33
B	9	1	FABP4+	14516.2	29644.5	FABP4+	159068	39	108.11	75.16	89.57	137.32	214.57	48.05	29.49	161.36	54.06	44.51	77.83	104.69	51.94	194.27	63.77	78.56	59.63	80.27	73.62	78.86	83.08	75.17	129.92	50.32	65.09	112.66	79.86	151.7	127.95	77.84	65.58	80.75	41.26	68.53	100.46	99.76	88.55	63.95	70.07	45.4	63.53
B	10	1	Geometric Segment	19033	42635		220293	-1	102.24	87.62	105.17	153.07	148.69	79.98	28.47	173.31	67.59	81.13	117.92	145.7	93.65	132.87	88.77	95.06	76.3	100.13	59.99	111.55	77.87	93.83	113.35	56.46	97.04	136.82	119.32	130.04	107.98	140.62	94.28	111.75	55.85	99.71	112.23	137.81	138.21	119.9	103.34	61.65	79.66
B	11	1	FABP4+	10156.6	11452.1	FABP4+	65183.3	153	128	83.35	89.65	113.2	198.05	66.13	31.13	162.91	59.48	49.56	109.94	78.59	64.22	184.46	77.85	79.15	85.58	69.74	65.28	80.87	85.76	90.79	133.5	45.97	69.26	113.99	103.77	137.76	176.86	80.07	65.55	89.38	43.02	86.28	82.18	95.97	157.74	76.87	74.72	39.6	58.75
B	12	1	FABP4+	23545.1	6772.3	FABP4+	102815	394	106.25	81.44	74.98	133.29	247.96	68.72	18.83	132.64	51.85	42.39	389.01	108.28	72.83	202.65	85.39	74.63	62.11	59.48	50.97	279.64	68.37	78.57	240.24	49.6	70.84	103.42	89.66	118.73	196.77	101.95	83.75	95.19	55.75	88.62	107.46	91.35	100.95	89.32	75.93	45.73	53.3
B	13	1	Geometric Segment	19115	10303		143409	-1	98.52	78.99	119.1	154.95	149.33	89.37	32.48	108.46	73.19	57.47	138.7	112.96	71.32	147.86	82.15	71.93	68.74	78.5	65.79	83.68	89.67	76.66	91.12	70.18	73.81	124.47	71.87	84.9	147.15	93.35	92.54	114.5	37.38	85.5	117.47	159.19	130.49	80.58	75.31	46.23	49.4
C	1	1	FABP4+	12314.9	74547	FABP4+	168318	159	147.09	59.23	75.01	104.01	315.55	67.85	28.22	59.21	62.45	37.55	98.6	104.31	62.78	188.39	91.18	85.02	54.8	78.59	45.42	94.87	89.94	51.89	94.04	58.36	83.64	63.44	74.81	73.57	183.04	103.18	63.91	94.31	29.84	69.64	112.56	71.06	63.11	70.56	72.85	41.63	42.16
C	2	1	FABP4+	11512.9	72496.3	FABP4+	153930	129	139.58	57.38	91.17	95.39	307.88	64.76	21.12	68.39	49.09	24.43	82.68	89.25	59.48	162.63	68.93	70.12	50.18	66.6	53.63	82.52	87.32	47.78	154.52	61.6	58.58	39.24	76.64	83.61	166.44	84.52	68.05	77.67	32.4	43.68	89.29	54.45	60.24	69.86	98.17	29.92	38.88
C	3	1	FABP4+	33945.9	81318.2	FABP4+	130633	268	66.49	57.98	104.9	185.46	285.94	70.57	53.67	86.19	31.81	64.65	300.06	177.14	48.85	165.14	103.11	39.76	112.75	105.76	46.28	75.18	82.77	55.52	61.78	20.81	60.67	51.93	93.61	107.47	174.07	43.29	42.21	84.08	35.47	84.34	111.02	29.81	56.26	41.08	96.49	59.38	47.48
C	4	1	Geometric Segment	29374	80685		176453	-1	126.47	63.69	95.88	119.95	231.5	84.83	33.09	66.27	83.08	29.48	92.51	118.22	66.14	174.24	51.78	60.57	66.52	128.88	48.34	90.37	67.55	53.69	117.8	80.01	93.88	72.1	97.78	75.2	128.56	90.02	88.17	107.07	45.03	73.42	115.23	83.25	85.7	68.54	79.69	43.07	41.33
C	6	1	FABP4+	31860.8	39635.5	FABP4+	116298	0	148.32	67.6	77.05	107.21	258.95	77.34	16.42	68.93	58.42	24.12	67.34	92.52	49.17	132.32	62.14	55.16	62.57	79.4	49.86	71.88	87.82	42.29	100.84	40.76	57.76	55.69	64.17	75.32	142.06	58.88	73.02	83.87	36.19	79.54	79.46	85.15	78.06	78.79	82.38	27.86	34.88
C	8	1	FABP4+	27109.6	37933.1	FABP4+	77052.3	30	130.43	50.96	70.15	146.76	313.36	105.18	28.71	76.08	72.34	46.94	127.93	149.27	71.87	178.71	84.86	77.11	88.47	84.87	76.76	91.94	127.32	54.45	134.57	77.94	56.8	53.58	60.1	77.79	194.72	71.41	72.26	77.47	52.19	72.7	98.24	107.66	90.3	68.69	79.42	51.62	48.69
C	9	1	Geometric Segment	19110.4	37848.9		306624	-1	113.21	58.86	102.51	110.26	284.73	99.07	30.17	89.01	65.8	38.97	106.73	119.5	73.23	204.21	77.94	85.54	60.51	99.23	64.75	88.25	97.66	77.06	142.59	68.17	101.05	56.42	103.43	85.64	192.41	94.94	80.61	99.07	48.25	79.09	136.09	83.59	86.42	75.84	72.53	52.34	56.24
C	10	1	Geometric Segment	19006	17200		130562	-1	95.19	84.75	121.25	149.34	146.81	110.8	45.76	160.04	96.45	63	143.92	142.65	112.61	152.19	100.69	118.66	76.91	136.26	92.95	126.18	103.91	78.89	162.21	84.78	130.28	82.93	99.33	135.35	167.91	112.1	119.96	99.13	48.73	129.63	113.28	91.79	127.92	136.23	130.8	64.7	62.98
C	12	1	FABP4+	21803.3	12988.7	FABP4+	195004	228	121.57	60.11	83.63	135.85	258.32	57.7	32.91	106.59	56.91	36.82	92.97	109.54	51.59	178	68.9	62.99	74.52	97.28	63.39	87.82	74.03	47.29	120.88	55.3	66.14	60.65	64.11	71.72	160.13	74.48	78.51	92.62	43.51	62.26	95.15	63.23	80.51	54.59	78.14	31.86	37.21
[truncated: 43 more columns]

## Sheet: SNR_no_negprb3
Scan_ID	ROI_ID	AOI	Segment (Name/ Label)	ROI X Coordinate	ROI Y Coordinate	Segment tags	AOI surface area	AOI nuclei count	OAZ1	POLR2A	RAB7A	SDHA	UBB	NegPrb1	NegPrb2	NegPrb3	NegPrb4	NegPrb5	NegPrb6	AKT1	ARG1	B2M	BATF3	BCL2	CCL5	CCND1	CD27	CD274	CD276	CD3E	CD4	CD40	CD40LG	CD44	CD47	CD68	CD74	CD86	CD8A	CMKLR1	CSF1R	CTLA4	CTNNB1	CXCL10	CXCL9	CXCR6	DKK2	EPCAM	FAS
A	1	1	FABP4+	31761.6	78595.1	FABP4+	127211	89	0.59	0.31	0.5	0.67	1.02	0.4	0.17	0.33	0.32	0.21	0.91	0.63	0.24	1.7	0.42	0.41	0.27	0.24	0.22	0.81	0.28	0.28	0.62	0.34	0.34	0.35	0.28	0.8	1.19	0.45	0.38	0.33	0.19	0.33	0.55	0.38	0.33	0.29	0.62	0.2	0.21
A	2	1	FABP4+	34220.1	79088.4	FABP4+	137967	111	0.71	0.31	0.49	2.85	1.33	0.26	0.2	0.3	0.42	0.07	0.89	0.58	0.32	2.28	0.48	0.37	0.46	0.44	0.28	0.93	0.55	0.38	0.53	0.31	0.53	0.33	0.42	1.12	1.52	0.48	0.41	0.43	0.2	0.56	0.72	0.38	0.52	0.51	0.48	0.27	0.16
A	3	1	FABP4+	33037.8	70797.1	FABP4+	222849	109	0.41	0.28	0.27	0.28	0.78	0.21	0.09	0.26	0.3	0.13	0.91	0.44	0.23	0.83	0.28	0.18	0.28	0.19	0.16	0.96	0.26	0.26	0.32	0.19	0.22	0.27	0.14	0.46	0.78	0.24	0.3	0.2	0.15	0.27	0.38	0.24	0.23	0.21	0.27	0.1	0.14
A	4	1	Geometric Segment	34089	84480		169526	-1	0.64	0.58	0.59	0.48	0.73	0.53	0.29	0.49	0.72	0.27	0.79	0.56	0.61	1.36	0.69	0.53	0.33	0.67	0.31	0.85	0.51	0.51	0.78	0.43	0.83	0.48	0.54	0.77	1.25	0.63	0.42	0.71	0.22	1.2	0.58	0.44	0.45	0.46	0.98	0.2	0.17
A	5	1	FABP4+	37944.8	10042.7	FABP4+	227594	14	0.64	0.34	0.47	0.57	0.99	0.35	0.12	0.55	0.59	0.24	0.83	0.63	0.33	0.91	0.56	0.38	0.46	0.34	0.58	0.66	0.41	0.35	0.67	0.26	0.3	0.46	0.27	0.84	0.73	0.43	0.36	0.47	0.23	0.35	0.53	0.4	0.55	0.38	0.55	0.31	0.19
A	6	1	FABP4+	15249.1	30768.1	FABP4+	291049	157	0.89	0.41	0.57	0.68	1.84	0.39	0.21	0.55	0.56	0.21	0.87	0.68	0.41	1.36	0.54	0.39	0.43	0.55	0.49	0.8	0.63	0.43	0.74	0.4	0.35	0.46	0.35	1.09	1.04	0.52	0.55	0.44	0.21	0.53	0.85	0.48	0.61	0.41	0.56	0.28	0.24
A	7	1	FABP4+	9499.1	29135.7	FABP4+	298870	100	0.78	0.47	0.59	0.84	1.52	0.43	0.16	0.64	0.57	0.27	0.85	0.75	0.45	1.51	0.56	0.45	0.46	0.34	0.5	0.76	0.54	0.49	0.93	0.31	0.4	0.62	0.36	0.9	1.65	0.49	0.46	0.49	0.23	0.48	0.63	0.45	0.66	0.51	0.57	0.27	0.21
A	8	1	Geometric Segment	16008	52844		327876	-1	0.51	0.51	0.61	0.67	0.71	0.47	0.2	0.55	0.72	0.29	0.77	0.76	0.49	0.86	0.6	0.45	0.44	0.66	0.4	0.65	0.54	0.51	0.9	0.33	0.55	0.55	0.4	0.84	0.98	0.58	0.62	0.64	0.24	0.7	0.75	0.51	0.54	0.51	0.64	0.3	0.23
A	9	1	FABP4+	24954.7	33074.3	FABP4+	328357	140	0.82	0.49	0.73	0.88	1.62	0.47	0.19	0.47	0.6	0.32	0.85	0.68	0.44	1.26	0.56	0.4	0.41	0.52	0.39	0.69	0.48	0.43	0.83	0.4	0.47	0.51	0.42	0.88	1.27	0.46	0.5	0.49	0.24	0.5	0.79	0.47	0.59	0.44	0.58	0.29	0.25
A	10	1	FABP4+	30478.8	8864	FABP4+	199904	84	0.51	0.28	0.33	0.61	0.73	0.3	0.09	2.47	0.35	0.16	0.9	0.48	0.25	0.71	0.36	0.31	0.32	0.33	0.39	0.68	0.35	0.23	1.05	0.22	0.3	0.39	0.26	0.58	0.54	0.4	0.36	0.34	0.14	0.3	0.48	0.44	0.42	0.28	0.47	0.26	0.21
A	11	1	FABP4+	34517.3	12871.5	FABP4+	177797	0	0.4	0.39	0.34	0.62	0.72	0.3	0.15	0.5	0.42	0.18	0.9	0.6	0.34	0.79	0.38	0.29	0.45	0.31	0.43	0.55	0.41	0.34	0.72	0.28	0.41	0.35	0.21	0.69	0.68	0.4	0.61	0.44	0.16	0.38	0.63	0.34	0.48	0.3	0.49	0.21	0.2
A	12	1	FABP4+	29057.5	13657.5	FABP4+	170566	152	0.35	0.3	0.4	0.5	0.78	0.25	0.15	0.39	0.37	0.16	0.91	0.57	0.29	0.85	0.26	0.27	0.34	0.26	0.26	0.68	0.38	0.27	1.16	0.17	0.3	0.32	0.25	0.59	0.6	0.29	0.27	0.34	0.16	0.34	0.4	0.39	0.5	0.28	0.5	0.13	0.21
B	1	1	FABP4+	33798.7	79147.4	FABP4+	221076	678	1.49	0.76	0.89	0.93	3.61	0.57	0.25	0.97	0.31	0.41	0.89	1.17	0.49	3.4	0.56	0.73	0.46	0.5	0.38	0.68	0.58	0.67	0.84	0.5	0.82	1.12	0.68	1.7	2.86	0.63	0.51	0.8	0.44	0.64	0.85	1.02	1.74	0.61	0.63	0.45	0.53
B	2	1	FABP4+	21382	78766.9	FABP4+	212655	594	1.24	0.79	0.59	1.04	2.14	0.7	0.19	1.03	0.43	0.54	0.79	1.11	0.7	1.79	0.66	0.81	0.67	0.79	0.47	0.83	0.67	0.8	1	0.45	0.57	1	0.85	1.48	1.2	0.76	0.5	0.77	0.29	0.7	0.79	0.93	0.71	0.75	0.67	0.45	0.44
B	3	1	FABP4+	15160.2	62593.4	FABP4+	271627	362	0.77	0.4	0.53	0.73	1.87	0.34	0.13	0.8	0.42	0.26	0.9	0.63	0.41	1.32	0.33	0.57	0.49	0.43	0.31	0.79	0.45	0.6	0.85	0.32	0.35	0.64	0.57	0.77	0.82	0.51	0.45	0.49	0.2	0.39	0.52	0.71	0.65	0.44	0.53	0.39	0.18
B	4	1	FABP4+	20060.3	87587.9	FABP4+	284318	852	0.98	0.57	0.61	2.04	1.41	0.62	0.19	0.96	0.57	0.46	0.82	0.97	0.44	1.82	0.52	0.74	0.56	0.58	0.26	0.69	0.53	0.64	0.76	0.45	0.59	0.69	0.57	1.03	0.86	0.7	0.52	0.56	0.3	0.65	0.58	0.8	0.95	0.53	0.44	0.34	0.34
B	5	1	Geometric Segment	35825	70727		71021.5	-1	1.22	0.76	0.79	0.82	1.83	0.47	0.35	0.92	0.51	0.42	0.94	0.76	0.78	1.55	0.6	0.61	0.69	0.73	0.4	1.09	0.65	0.77	0.93	0.46	0.77	0.96	0.71	0.66	1.05	0.72	0.59	0.68	0.45	0.72	0.89	0.77	0.69	0.69	0.64	0.52	0.56
B	6	1	FABP4+	37961.8	44576.5	FABP4+	141282	334	1.2	0.46	0.81	1.15	2.25	0.54	0.3	1.32	0.47	0.45	0.92	0.8	0.44	1.97	0.6	0.75	0.75	0.82	0.7	0.69	0.96	0.54	1.38	0.47	0.64	1.09	0.65	1.19	1	0.84	0.51	0.88	0.38	0.62	0.89	1.03	1.36	0.68	0.83	0.56	0.44
B	7	1	FABP4+	35966.4	47023.1	FABP4+	130770	316	1.86	0.74	1.01	1.44	4.03	0.76	0.45	1.11	0.49	0.54	0.88	1.23	0.73	2.81	0.7	1.17	0.73	0.9	0.72	0.75	1.08	0.76	1.25	0.81	0.72	1.13	0.86	1.57	1.39	0.82	0.74	0.99	0.47	0.9	0.92	1.17	1.58	0.77	0.92	0.63	0.73
B	8	1	FABP4+	19223	15078.2	FABP4+	92816.9	489	1.14	0.69	0.84	1.73	2.28	0.61	0.13	1.28	0.58	0.4	0.79	1.04	0.55	2.02	0.75	0.8	0.56	0.7	0.65	0.63	0.74	0.62	1.2	0.49	0.68	0.8	0.8	1.45	1.8	0.88	0.81	0.53	0.24	0.72	0.8	0.83	1.25	0.69	0.73	0.61	0.38
B	9	1	FABP4+	14516.2	29644.5	FABP4+	159068	39	1.26	0.87	1.04	1.6	2.49	0.56	0.34	1.88	0.63	0.52	0.9	1.22	0.6	2.26	0.74	0.91	0.69	0.93	0.86	0.92	0.97	0.87	1.51	0.58	0.76	1.31	0.93	1.76	1.49	0.9	0.76	0.94	0.48	0.8	1.17	1.16	1.03	0.74	0.81	0.53	0.74
B	10	1	Geometric Segment	19033	42635		220293	-1	0.73	0.63	0.76	1.1	1.07	0.57	0.2	1.24	0.49	0.58	0.85	1.05	0.67	0.95	0.64	0.68	0.55	0.72	0.43	0.8	0.56	0.67	0.81	0.41	0.7	0.98	0.86	0.93	0.78	1.01	0.68	0.8	0.4	0.72	0.81	0.99	0.99	0.86	0.74	0.44	0.57
B	11	1	FABP4+	10156.6	11452.1	FABP4+	65183.3	153	1.05	0.68	0.74	0.93	1.63	0.54	0.26	1.34	0.49	0.41	0.9	0.65	0.53	1.52	0.64	0.65	0.7	0.57	0.54	0.66	0.7	0.75	1.1	0.38	0.57	0.94	0.85	1.13	1.45	0.66	0.54	0.73	0.35	0.71	0.68	0.79	1.3	0.63	0.61	0.33	0.48
B	12	1	FABP4+	23545.1	6772.3	FABP4+	102815	394	0.25	0.19	0.18	0.31	0.59	0.16	0.04	0.31	0.12	0.1	0.92	0.26	0.17	0.48	0.2	0.18	0.15	0.14	0.12	0.66	0.16	0.19	0.57	0.12	0.17	0.24	0.21	0.28	0.46	0.24	0.2	0.22	0.13	0.21	0.25	0.22	0.24	0.21	0.18	0.11	0.13
B	13	1	Geometric Segment	19115	10303		143409	-1	0.62	0.5	0.75	0.98	0.95	0.57	0.21	0.69	0.46	0.36	0.88	0.72	0.45	0.94	0.52	0.46	0.44	0.5	0.42	0.53	0.57	0.49	0.58	0.44	0.47	0.79	0.46	0.54	0.93	0.59	0.59	0.73	0.24	0.54	0.74	1.01	0.83	0.51	0.48	0.29	0.31
C	1	1	FABP4+	12314.9	74547	FABP4+	168318	159	1.29	0.52	0.66	0.91	2.76	0.59	0.25	0.52	0.55	0.33	0.86	0.91	0.55	1.65	0.8	0.74	0.48	0.69	0.4	0.83	0.79	0.45	0.82	0.51	0.73	0.56	0.65	0.64	1.6	0.9	0.56	0.83	0.26	0.61	0.98	0.62	0.55	0.62	0.64	0.36	0.37
C	2	1	FABP4+	11512.9	72496.3	FABP4+	153930	129	1.38	0.57	0.9	0.94	3.05	0.64	0.21	0.68	0.49	0.24	0.82	0.88	0.59	1.61	0.68	0.69	0.5	0.66	0.53	0.82	0.86	0.47	1.53	0.61	0.58	0.39	0.76	0.83	1.65	0.84	0.67	0.77	0.32	0.43	0.88	0.54	0.6	0.69	0.97	0.3	0.39
C	3	1	FABP4+	33945.9	81318.2	FABP4+	130633	268	0.2	0.18	0.32	0.57	0.88	0.22	0.17	0.27	0.1	0.2	0.92	0.54	0.15	0.51	0.32	0.12	0.35	0.33	0.14	0.23	0.25	0.17	0.19	0.06	0.19	0.16	0.29	0.33	0.54	0.13	0.13	0.26	0.11	0.26	0.34	0.09	0.17	0.13	0.3	0.18	0.15
C	4	1	Geometric Segment	29374	80685		176453	-1	1	0.51	0.76	0.95	1.84	0.67	0.26	0.53	0.66	0.23	0.73	0.94	0.53	1.38	0.41	0.48	0.53	1.02	0.38	0.72	0.54	0.43	0.94	0.64	0.75	0.57	0.78	0.6	1.02	0.72	0.7	0.85	0.36	0.58	0.92	0.66	0.68	0.54	0.63	0.34	0.33
C	6	1	FABP4+	31860.8	39635.5	FABP4+	116298	0	1.44	0.66	0.75	1.04	2.52	0.75	0.16	0.67	0.57	0.23	0.66	0.9	0.48	1.29	0.61	0.54	0.61	0.77	0.49	0.7	0.86	0.41	0.98	0.4	0.56	0.54	0.63	0.73	1.38	0.57	0.71	0.82	0.35	0.77	0.77	0.83	0.76	0.77	0.8	0.27	0.34
C	8	1	FABP4+	27109.6	37933.1	FABP4+	77052.3	30	0.83	0.32	0.44	0.93	1.99	0.67	0.18	0.48	0.46	0.3	0.81	0.95	0.46	1.13	0.54	0.49	0.56	0.54	0.49	0.58	0.81	0.35	0.85	0.49	0.36	0.34	0.38	0.49	1.23	0.45	0.46	0.49	0.33	0.46	0.62	0.68	0.57	0.44	0.5	0.33	0.31
C	9	1	Geometric Segment	19110.4	37848.9		306624	-1	0.83	0.43	0.75	0.8	2.08	0.72	0.22	0.65	0.48	0.28	0.78	0.87	0.53	1.49	0.57	0.62	0.44	0.72	0.47	0.64	0.71	0.56	1.04	0.5	0.74	0.41	0.75	0.62	1.4	0.69	0.59	0.72	0.35	0.58	0.99	0.61	0.63	0.55	0.53	0.38	0.41
C	10	1	Geometric Segment	19006	17200		130562	-1	0.56	0.5	0.71	0.88	0.86	0.65	0.27	0.94	0.57	0.37	0.85	0.84	0.66	0.9	0.59	0.7	0.45	0.8	0.55	0.74	0.61	0.46	0.96	0.5	0.77	0.49	0.59	0.8	0.99	0.66	0.71	0.58	0.29	0.76	0.67	0.54	0.75	0.8	0.77	0.38	0.37
C	12	1	FABP4+	21803.3	12988.7	FABP4+	195004	228	1.18	0.58	0.81	1.32	2.51	0.56	0.32	1.03	0.55	0.36	0.9	1.06	0.5	1.73	0.67	0.61	0.72	0.94	0.61	0.85	0.72	0.46	1.17	0.54	0.64	0.59	0.62	0.7	1.55	0.72	0.76	0.9	0.42	0.6	0.92	0.61	0.78	0.53	0.76	0.31	0.36
[truncated: 43 more columns]

## Sheet: grouped by function SDHA  NORM
All Targets;Reference Gene	10	SDHA	0.91	0.94	0.57	1.15	1.44	1.6	0.57	0.61	0.62	0.5	1.32	1.73	0.93	0.31	0.67	2.85	0.28	0.68	0.84	0.88	0.93	1.04	0.73	2.04	1.04	0.93	0.95	1.1	0.98	0.48	0.67	0.88	0.82	0.8
All Targets;Background	1	NegPrb1	0.59	0.64	0.22	0.54	0.76	0.56	0.35	0.3	0.3	0.25	0.56	0.61	0.54	0.16	0.4	0.26	0.21	0.39	0.43	0.47	0.57	0.7	0.34	0.62	0.75	0.67	0.67	0.57	0.57	0.53	0.47	0.65	0.47	0.72
All Targets;Background	2	NegPrb2	0.25	0.21	0.17	0.3	0.45	0.34	0.12	0.09	0.15	0.15	0.32	0.13	0.26	0.04	0.17	0.2	0.09	0.21	0.16	0.19	0.25	0.19	0.13	0.19	0.16	0.18	0.26	0.2	0.21	0.29	0.2	0.27	0.35	0.22
All Targets;Background	3	NegPrb3	0.52	0.68	0.27	1.32	1.11	1.88	0.55	2.47	0.5	0.39	1.03	1.28	1.34	0.31	0.33	0.3	0.26	0.55	0.64	0.47	0.97	1.03	0.8	0.96	0.67	0.48	0.53	1.24	0.69	0.49	0.55	0.94	0.92	0.65
All Targets;Background	4	NegPrb4	0.55	0.49	0.1	0.47	0.49	0.63	0.59	0.35	0.42	0.37	0.55	0.58	0.49	0.12	0.32	0.42	0.3	0.56	0.57	0.6	0.31	0.43	0.42	0.57	0.57	0.46	0.66	0.49	0.46	0.72	0.72	0.57	0.51	0.48
All Targets;Background	5	NegPrb5	0.33	0.24	0.2	0.45	0.54	0.52	0.24	0.16	0.18	0.16	0.36	0.4	0.41	0.1	0.21	0.07	0.13	0.21	0.27	0.32	0.41	0.54	0.26	0.46	0.23	0.3	0.23	0.58	0.36	0.27	0.29	0.37	0.42	0.28
All Targets;Background	6	NegPrb6	0.86	0.82	0.92	0.92	0.88	0.9	0.83	0.9	0.9	0.91	0.9	0.79	0.9	0.92	0.91	0.89	0.91	0.87	0.85	0.85	0.89	0.79	0.9	0.82	0.66	0.81	0.73	0.85	0.88	0.79	0.77	0.85	0.94	0.78
All Targets;Reference Gene	7	OAZ1	1.29	1.38	0.2	1.2	1.86	1.26	0.64	0.51	0.4	0.35	1.18	1.14	1.05	0.25	0.59	0.71	0.41	0.89	0.78	0.82	1.49	1.24	0.77	0.98	1.44	0.83	1	0.73	0.62	0.64	0.51	0.56	1.22	0.83
All Targets;Reference Gene	8	POLR2A	0.52	0.57	0.18	0.46	0.74	0.87	0.34	0.28	0.39	0.3	0.58	0.69	0.68	0.19	0.31	0.31	0.28	0.41	0.47	0.49	0.76	0.79	0.4	0.57	0.66	0.32	0.51	0.63	0.5	0.58	0.51	0.5	0.76	0.43
All Targets;Reference Gene	9	RAB7A	0.66	0.9	0.32	0.81	1.01	1.04	0.47	0.33	0.34	0.4	0.81	0.84	0.74	0.18	0.5	0.49	0.27	0.57	0.59	0.73	0.89	0.59	0.53	0.61	0.75	0.44	0.76	0.76	0.75	0.59	0.61	0.71	0.79	0.75
All Targets;Reference Gene	10	SDHA	0.91	0.94	0.57	1.15	1.44	1.6	0.57	0.61	0.62	0.5	1.32	1.73	0.93	0.31	0.67	2.85	0.28	0.68	0.84	0.88	0.93	1.04	0.73	2.04	1.04	0.93	0.95	1.1	0.98	0.48	0.67	0.88	0.82	0.8
All Targets;Reference Gene	11	UBB	2.76	3.05	0.88	2.25	4.03	2.49	0.99	0.73	0.72	0.78	2.51	2.28	1.63	0.59	1.02	1.33	0.78	1.84	1.52	1.62	3.61	2.14	1.87	1.41	2.52	1.99	1.84	1.07	0.95	0.73	0.71	0.86	1.83	2.08
All Targets;Cytokine & Chemokine Signaling	12	CCL5	0.48	0.5	0.35	0.75	0.73	0.69	0.46	0.32	0.45	0.34	0.72	0.56	0.7	0.15	0.27	0.46	0.28	0.43	0.46	0.41	0.46	0.67	0.49	0.56	0.61	0.56	0.53	0.55	0.44	0.33	0.44	0.45	0.69	0.44
All Targets;Cytokine & Chemokine Signaling	13	CMKLR1	0.83	0.77	0.26	0.88	0.99	0.94	0.47	0.34	0.44	0.34	0.9	0.53	0.73	0.22	0.33	0.43	0.2	0.44	0.49	0.49	0.8	0.77	0.49	0.56	0.82	0.49	0.85	0.8	0.73	0.71	0.64	0.58	0.68	0.72
All Targets;Cytokine & Chemokine Signaling	14	CXCL10	0.62	0.54	0.09	1.03	1.17	1.16	0.4	0.44	0.34	0.39	0.61	0.83	0.79	0.22	0.38	0.38	0.24	0.48	0.45	0.47	1.02	0.93	0.71	0.8	0.83	0.68	0.66	0.99	1.01	0.44	0.51	0.54	0.77	0.61
All Targets;Cytokine & Chemokine Signaling	15	CXCL9	0.55	0.6	0.17	1.36	1.58	1.03	0.55	0.42	0.48	0.5	0.78	1.25	1.3	0.24	0.33	0.52	0.23	0.61	0.66	0.59	1.74	0.71	0.65	0.95	0.76	0.57	0.68	0.99	0.83	0.45	0.54	0.75	0.69	0.63
All Targets;Cytokine & Chemokine Signaling	16	CXCR6	0.62	0.69	0.13	0.68	0.77	0.74	0.38	0.28	0.3	0.28	0.53	0.69	0.63	0.21	0.29	0.51	0.21	0.41	0.51	0.44	0.61	0.75	0.44	0.53	0.77	0.44	0.54	0.86	0.51	0.46	0.51	0.8	0.69	0.55
All Targets;Cytokine & Chemokine Signaling	17	IL12B	0.4	0.54	0.14	0.63	0.82	0.8	0.39	0.29	0.37	0.4	0.48	0.9	0.7	0.2	0.22	0.37	0.23	0.45	0.4	0.53	0.77	0.73	0.49	0.63	0.74	0.29	0.32	0.87	0.41	0.46	0.5	0.51	0.71	0.44
All Targets;Cytokine & Chemokine Signaling	18	IL15	0.8	0.78	0.24	0.85	0.74	0.83	0.54	0.34	0.42	0.21	0.76	0.67	0.64	0.25	0.36	0.37	0.18	0.54	0.53	0.5	0.54	0.73	0.6	0.63	0.92	0.58	0.75	0.81	0.66	0.49	0.59	0.59	0.52	0.73
All Targets;Cytokine & Chemokine Signaling	19	IL6	0.43	0.56	0.09	0.96	0.91	1.06	0.46	0.39	0.45	0.39	0.46	0.64	0.68	0.23	0.47	0.49	0.22	0.47	0.54	0.56	0.66	0.63	0.57	0.71	0.73	0.56	0.54	0.6	0.44	0.29	0.44	0.54	0.66	0.6
All Targets;Cytokine & Chemokine Signaling	20	STAT1	0.63	0.71	0.26	0.77	0.71	0.93	0.52	0.5	0.55	0.46	0.77	0.65	0.58	0.18	0.59	0.93	0.29	0.72	0.73	0.66	0.52	0.46	0.39	0.49	0.44	0.63	0.66	0.57	0.5	1.25	0.81	0.76	0.62	0.76
All Targets;Cytokine & Chemokine Signaling	21	STAT2	0.7	0.67	0.35	0.75	0.79	0.63	0.28	0.29	0.38	0.24	0.73	0.67	0.75	0.19	0.34	0.33	0.22	0.43	0.42	0.34	0.73	0.57	0.38	0.65	0.58	0.46	0.62	0.53	0.47	0.4	0.44	0.6	0.49	0.6
All Targets;Cytokine & Chemokine Signaling	22	STAT3	0.69	0.66	0.08	0.73	0.97	0.83	0.43	0.38	0.42	0.32	0.46	0.87	0.7	0.2	0.36	0.39	0.3	0.49	0.49	0.53	0.79	0.62	0.54	0.58	0.62	0.48	0.73	0.75	0.69	0.62	0.56	0.57	0.62	0.74
All Targets;Apoptosis;Cytokine & Chemokine Signaling	23	FAS	0.37	0.39	0.15	0.44	0.73	0.74	0.19	0.21	0.2	0.21	0.36	0.38	0.48	0.13	0.21	0.16	0.14	0.24	0.21	0.25	0.53	0.44	0.18	0.34	0.34	0.31	0.33	0.57	0.31	0.17	0.23	0.37	0.56	0.41
All Targets;Apoptosis;Cytokine & Chemokine Signaling	24	TNF	0.65	1.01	0.23	1.34	1.63	2.42	0.85	0.89	0.57	0.5	0.96	1.62	1.41	0.31	0.23	0.63	0.27	0.96	0.82	0.52	0.94	1.22	0.65	0.67	0.65	0.55	0.56	1.17	1.15	0.49	0.54	0.66	1.71	0.69
All Targets;Interferon	25	IFNAR1	0.76	0.68	0.3	0.65	0.94	0.98	0.38	0.3	0.31	0.3	0.79	1.04	0.84	0.2	0.35	0.52	0.27	0.41	0.48	0.5	0.75	0.8	0.62	0.82	0.72	0.55	0.53	0.91	0.64	0.47	0.59	0.61	0.85	0.69
All Targets;Interferon	26	IFNG	0.21	0.1	0.05	0.22	0.18	0.36	0.12	0.11	0.11	0.09	0.19	0.31	0.27	0.07	0.1	0.15	0.07	0.14	0.1	0.18	0.26	0.22	0.17	0.2	0.12	0.13	0.2	0.2	0.2	0.1	0.17	0.22	0.21	0.17
All Targets;Interferon	27	IFNGR1	0.49	0.41	0.2	0.43	0.59	0.51	0.28	0.2	0.28	0.14	0.45	0.47	0.42	0.13	0.2	0.31	0.15	0.31	0.33	0.33	0.47	0.55	0.35	0.31	0.44	0.32	0.38	0.36	0.27	0.33	0.27	0.39	0.36	0.3
All Targets;Cytokine & Chemokine Signaling	28	VEGFA	0.59	0.67	0.17	0.66	1.11	1.26	0.42	0.32	0.35	0.31	0.51	0.99	0.61	0.28	0.37	0.39	0.29	0.48	0.49	0.45	0.97	0.85	0.53	0.67	0.48	0.46	0.54	0.77	0.58	0.95	0.63	0.62	0.93	0.56
All Targets;Tumor;Cytokine & Chemokine Signaling	29	HIF1A	0.94	0.82	0.51	0.86	1.01	0.89	0.41	0.41	0.44	0.33	0.92	0.97	0.79	0.24	0.46	0.4	0.22	0.57	0.63	0.61	0.64	0.69	0.4	0.61	0.72	0.67	0.87	0.73	0.47	0.48	0.55	0.71	0.47	0.66
All Targets;Immune Cell Adhesion & Migration	30	ICAM1	0.7	0.69	0.23	0.77	0.84	0.94	0.52	0.36	0.33	0.39	0.69	0.76	0.61	0.17	0.48	0.38	0.21	0.47	0.5	0.55	0.69	0.58	0.51	0.58	0.58	0.48	0.54	0.79	0.64	0.57	0.69	0.57	0.83	0.6
All Targets;Immune Cell Adhesion & Migration	31	ITGAM	0.47	0.56	0.26	0.79	0.79	1.11	0.49	0.35	0.44	0.41	0.59	0.79	0.85	0.16	0.31	0.37	0.22	0.4	0.43	0.45	0.58	0.87	0.62	0.59	0.7	0.43	0.42	0.57	0.36	0.55	0.4	0.69	0.5	0.44
All Targets;Immune Cell Adhesion & Migration	32	ITGAV	0.69	0.98	0.48	0.49	0.81	0.82	0.41	0.32	0.41	0.38	0.74	0.65	0.39	0.12	0.38	0.31	0.27	0.59	0.57	0.51	0.5	0.55	0.28	0.53	0.66	0.83	0.91	0.56	0.69	0.5	0.66	0.81	0.38	0.78
All Targets;Immune Cell Adhesion & Migration	33	ITGAX	0.68	0.93	0.38	0.96	1.15	1.07	0.43	0.51	0.43	0.49	0.92	0.95	0.93	0.23	0.32	0.33	0.31	0.54	0.53	0.53	0.71	0.85	0.49	0.72	0.74	0.6	0.78	0.85	0.67	0.48	0.59	0.7	0.81	0.57
All Targets;Immune Cell Adhesion & Migration	34	ITGB2	0.77	0.89	0.4	0.88	0.78	0.86	0.31	0.23	0.33	0.31	0.7	0.68	0.6	0.19	0.3	0.38	0.27	0.4	0.41	0.43	0.65	0.68	0.34	0.59	0.71	0.47	0.72	0.51	0.52	0.43	0.44	0.73	0.57	0.64
All Targets;Immune Cell Adhesion & Migration	35	ITGB8	0.52	0.57	0.17	0.69	0.97	0.76	0.38	0.3	0.35	0.27	0.79	0.85	0.77	0.18	0.35	0.39	0.26	0.44	0.36	0.4	0.79	0.8	0.48	0.47	0.6	0.5	0.81	0.77	0.58	0.58	0.54	0.71	0.76	0.76
All Targets;Immune Cell Adhesion & Migration	36	PECAM1	0.78	0.58	0.07	0.6	0.7	0.89	0.48	0.41	0.52	0.37	0.7	0.63	0.69	0.22	0.69	0.98	0.51	0.57	0.79	0.72	0.66	0.67	0.45	0.43	0.55	0.49	0.43	0.55	0.63	1	0.76	0.46	0.61	0.48
All Targets;MHC2;Antigen Presentation	37	CD74	1.6	1.65	0.54	1	1.39	1.49	0.73	0.54	0.68	0.6	1.55	1.8	1.45	0.46	1.19	1.52	0.78	1.04	1.65	1.27	2.86	1.2	0.82	0.86	1.38	1.23	1.02	0.78	0.93	1.25	0.98	0.99	1.05	1.4
All Targets;MHC2;Antigen Presentation	38	HLA-DQ	1.09	0.66	0.11	0.93	1.43	1.18	0.55	0.45	0.57	0.52	0.73	0.76	0.99	0.24	0.64	0.62	0.33	0.68	0.71	0.71	0.9	0.78	0.75	0.87	1.04	0.65	0.63	0.82	0.54	0.6	0.6	0.64	0.72	0.62
All Targets;MHC2;Antigen Presentation	39	HLA-DRB	1.05	0.91	0.17	2.9	2.55	3.39	0.6	0.46	0.64	0.48	1.17	2.74	2.74	0.77	0.89	0.9	0.5	1.02	1.11	0.92	3.07	2.17	1.42	2.13	0.68	0.53	1.03	2.14	1.14	0.99	1.01	1.12	1.96	0.93
All Targets;Antigen Presentation	40	HLA-E	0.9	0.64	0.17	0.96	0.84	0.73	0.33	0.27	0.26	0.26	0.94	1.01	0.78	0.16	0.38	0.47	0.29	0.55	0.55	0.49	0.92	0.58	0.52	0.54	0.63	0.52	0.49	0.47	0.4	0.37	0.37	0.51	0.44	0.6
All Targets;Antigen Presentation	41	PSMB10	0.52	0.55	0.11	1.1	1.23	1.11	0.17	0.24	0.28	0.23	0.54	0.94	0.71	0.22	0.15	0.26	0.09	0.46	0.22	0.35	0.83	0.73	0.51	1.11	0.58	0.43	0.53	0.79	0.83	0.3	0.31	0.59	0.64	0.45
All Targets;Tumor;Antigen Presentation	42	B2M	1.65	1.61	0.51	1.97	2.81	2.26	0.91	0.71	0.79	0.85	1.73	2.02	1.52	0.48	1.7	2.28	0.83	1.36	1.51	1.26	3.4	1.79	1.32	1.82	1.29	1.13	1.38	0.95	0.94	1.36	0.86	0.9	1.55	1.49
All Targets;T cell Activation;Myeloid;Checkpoint	43	CD86	0.9	0.84	0.13	0.84	0.82	0.9	0.43	0.4	0.4	0.29	0.72	0.88	0.66	0.24	0.45	0.48	0.24	0.52	0.49	0.46	0.63	0.76	0.51	0.7	0.57	0.45	0.72	1.01	0.59	0.63	0.58	0.66	0.72	0.69
All Targets;M2 Macrophage;Myeloid Supression;Myeloid Activation;Macrophage;Myeloid	44	ARG1	0.55	0.59	0.15	0.44	0.73	0.6	0.33	0.25	0.34	0.29	0.5	0.55	0.53	0.17	0.24	0.32	0.23	0.41	0.45	0.44	0.49	0.7	0.41	0.44	0.48	0.46	0.53	0.67	0.45	0.61	0.49	0.66	0.78	0.53
All Targets;Myeloid	45	CD47	0.65	0.76	0.29	0.65	0.86	0.93	0.27	0.26	0.21	0.25	0.62	0.8	0.85	0.21	0.28	0.42	0.14	0.35	0.36	0.42	0.68	0.85	0.57	0.57	0.63	0.38	0.78	0.86	0.46	0.54	0.4	0.59	0.71	0.75
All Targets;Myeloid Activation;Checkpoint	46	CD274	0.83	0.82	0.23	0.69	0.75	0.92	0.66	0.68	0.55	0.68	0.85	0.63	0.66	0.66	0.81	0.93	0.96	0.8	0.76	0.69	0.68	0.83	0.79	0.69	0.7	0.58	0.72	0.8	0.53	0.85	0.65	0.74	1.09	0.64
All Targets;Myeloid Activation;Macrophage;Myeloid;Checkpoint	47	VSIR	0.41	0.45	0.14	0.65	0.9	0.74	0.35	0.24	0.28	0.2	0.63	0.6	0.63	0.15	0.25	0.29	0.24	0.39	0.33	0.43	0.52	0.51	0.37	0.48	0.62	0.66	0.37	0.49	0.49	0.37	0.4	0.58	0.45	0.46
All Targets;Myeloid Activation;Myeloid	48	CD40	0.51	0.61	0.06	0.47	0.81	0.58	0.26	0.22	0.28	0.17	0.54	0.49	0.38	0.12	0.34	0.31	0.19	0.4	0.31	0.4	0.5	0.45	0.32	0.45	0.4	0.49	0.64	0.41	0.44	0.43	0.33	0.5	0.46	0.5
All Targets;Myeloid Activation;Myeloid;Cytokine & Chemokine Signaling	49	CSF1R	0.26	0.32	0.11	0.38	0.47	0.48	0.23	0.14	0.16	0.16	0.42	0.24	0.35	0.13	0.19	0.2	0.15	0.21	0.23	0.24	0.44	0.29	0.2	0.3	0.35	0.33	0.36	0.4	0.24	0.22	0.24	0.29	0.45	0.35
All Targets;Myeloid Supression;Myeloid	50	IDO1	0.86	0.92	0.25	0.85	0.85	0.99	0.61	0.42	0.53	0.49	0.83	0.74	0.74	0.24	0.51	0.64	0.33	0.73	0.68	0.57	0.64	0.84	0.46	0.68	0.69	0.78	0.89	0.85	0.61	0.97	0.74	0.74	0.61	0.87
All Targets;Myeloid;Checkpoint;B cells	51	ICOSLG	0.43	0.53	0.13	0.81	0.97	1.06	0.5	0.36	0.47	0.31	0.47	0.57	1.13	0.19	0.47	0.35	0.29	0.56	0.55	0.53	0.87	0.86	0.56	0.8	0.5	0.63	0.47	0.91	0.63	0.64	0.62	0.57	0.79	0.5
All Targets;Total Immune	52	PTPRC	0.66	0.49	0.23	0.94	1.05	0.88	0.42	0.41	0.36	0.31	0.69	0.86	0.99	0.18	0.48	0.48	0.32	0.48	0.47	0.5	0.68	0.83	0.36	0.68	0.71	0.28	0.54	0.72	0.56	0.36	0.61	0.69	0.66	0.55
All Targets;DC	53	BATF3	0.8	0.68	0.32	0.6	0.7	0.74	0.56	0.36	0.38	0.26	0.67	0.75	0.64	0.2	0.42	0.48	0.28	0.54	0.56	0.56	0.56	0.66	0.33	0.52	0.61	0.54	0.41	0.64	0.52	0.69	0.6	0.59	0.6	0.57
All Targets;Macrophage	54	CD68	0.64	0.83	0.33	1.19	1.57	1.76	0.84	0.58	0.69	0.59	0.7	1.45	1.13	0.28	0.8	1.12	0.46	1.09	0.9	0.88	1.7	1.48	0.77	1.03	0.73	0.49	0.6	0.93	0.54	0.77	0.84	0.8	0.66	0.62
All Targets;T cells;Myeloid	55	LY6E	0.58	0.62	0.19	0.54	0.73	0.78	0.47	0.37	0.52	0.47	0.6	0.74	0.49	0.21	0.84	0.95	0.52	0.75	0.84	0.82	0.63	0.55	0.43	0.44	0.58	0.34	0.59	0.64	0.45	0.74	0.83	0.57	0.67	0.52
All Targets;B cells	56	MS4A1	0.52	0.53	0.11	0.78	1.56	1.18	0.43	0.34	0.42	0.3	0.88	0.81	0.81	0.61	0.41	0.28	0.28	0.47	0.51	0.44	0.57	0.8	0.58	0.64	0.45	0.43	0.55	0.91	0.55	0.6	0.56	0.79	0.74	0.68
All Targets;T cells	57	CD3E	0.45	0.47	0.17	0.54	0.76	0.87	0.35	0.23	0.34	0.27	0.46	0.62	0.75	0.19	0.28	0.38	0.26	0.43	0.49	0.43	0.67	0.8	0.6	0.64	0.41	0.35	0.43	0.67	0.49	0.51	0.51	0.46	0.77	0.56
All Targets;T cells;CD8 T cells	58	CD8A	0.56	0.67	0.13	0.51	0.74	0.76	0.36	0.36	0.61	0.27	0.76	0.81	0.54	0.2	0.38	0.41	0.3	0.55	0.46	0.5	0.51	0.5	0.45	0.52	0.71	0.46	0.7	0.68	0.59	0.42	0.62	0.71	0.59	0.59
All Targets;T cells;Th cells;Myeloid	59	CD4	0.82	1.53	0.19	1.38	1.25	1.51	0.67	1.05	0.72	1.16	1.17	1.2	1.1	0.57	0.62	0.53	0.32	0.74	0.93	0.83	0.84	1	0.85	0.76	0.98	0.85	0.94	0.81	0.58	0.78	0.9	0.96	0.93	1.04
All Targets;T cells;Th cells;Tregs	60	FOXP3	0.38	0.43	0.19	0.49	0.59	0.5	0.28	0.14	0.22	0.22	0.33	0.47	0.57	0.09	0.19	0.2	0.15	0.29	0.27	0.26	0.36	0.32	0.27	0.3	0.49	0.38	0.38	0.45	0.32	0.34	0.28	0.31	0.39	0.27
All Targets;T cell Activation	61	CD44	0.56	0.39	0.16	1.09	1.13	1.31	0.46	0.39	0.35	0.32	0.59	0.8	0.94	0.24	0.35	0.33	0.27	0.46	0.62	0.51	1.12	1	0.64	0.69	0.54	0.34	0.57	0.98	0.79	0.48	0.55	0.49	0.96	0.41
All Targets;T cell Activation;Cytotoxicity	62	GZMB	0.45	0.53	0.22	0.59	0.69	0.52	0.49	0.22	0.39	0.3	0.64	0.47	0.51	0.14	0.26	0.29	0.21	0.39	0.49	0.46	0.35	0.49	0.34	0.41	0.53	0.36	0.58	0.52	0.43	0.32	0.44	0.48	0.56	0.41
All Targets;Cytotoxicity	63	NKG7	0.56	0.54	0.15	1.67	1.1	1.17	0.62	0.41	0.56	0.41	0.5	0.86	1	0.18	0.36	0.39	0.3	0.48	0.56	0.56	0.89	0.99	0.78	0.55	0.74	0.39	0.67	0.89	0.56	0.42	0.47	0.65	0.97	0.51
All Targets;Th cells	64	TBX21	0.57	0.56	0.2	0.98	1.01	1.27	0.47	0.33	0.3	0.28	0.78	0.9	0.99	0.21	0.33	0.41	0.2	0.42	0.54	0.46	0.71	0.7	0.52	0.7	0.64	0.48	0.59	0.89	0.63	0.37	0.49	0.7	0.71	0.72
All Targets;T cells	65	CD40LG	0.73	0.58	0.19	0.64	0.72	0.76	0.3	0.3	0.41	0.3	0.64	0.68	0.57	0.17	0.34	0.53	0.22	0.35	0.4	0.47	0.82	0.57	0.35	0.59	0.56	0.36	0.75	0.7	0.47	0.83	0.55	0.77	0.77	0.74
All Targets;T cells;T cell Activation	66	CD27	0.4	0.53	0.14	0.7	0.72	0.86	0.58	0.39	0.43	0.26	0.61	0.65	0.54	0.12	0.22	0.28	0.16	0.49	0.5	0.39	0.38	0.47	0.31	0.26	0.49	0.49	0.38	0.43	0.42	0.31	0.4	0.55	0.4	0.47
All Targets;T cells;T cell Activation	67	TNFRSF9	0.66	0.8	0.16	0.95	1.42	0.99	0.4	0.32	0.4	0.31	0.83	0.93	0.82	0.21	0.39	0.36	0.26	0.47	0.5	0.48	0.81	0.87	0.58	0.53	0.64	0.53	0.7	0.96	0.62	0.42	0.57	0.65	0.71	0.58
All Targets;T cells;T cell Activation;Checkpoint	68	HAVCR2	0.86	0.79	0.18	1.15	1.37	1.45	0.88	0.62	0.62	0.57	0.79	1.2	1.15	0.33	0.52	0.36	0.36	0.71	0.75	0.87	1.07	1.04	0.81	0.84	0.61	0.5	0.65	0.99	0.78	0.62	0.78	0.79	1.07	0.66
All Targets;T cells;T cell Activation;Checkpoint	69	LAG3	0.6	0.53	0.37	0.61	0.59	0.67	0.9	0.44	0.6	0.42	0.57	0.74	0.45	0.14	0.21	0.42	0.27	0.48	0.56	0.57	0.3	0.57	0.35	0.38	0.66	0.61	0.54	0.64	0.47	0.62	0.54	0.46	0.22	0.53
All Targets;T cells;T cell Activation;Checkpoint	70	PDCD1	0.7	0.85	0.3	1.23	1.08	1.13	0.52	0.48	0.51	0.49	0.68	0.8	6.54	0.32	0.48	0.61	0.3	0.67	0.59	0.65	0.72	0.82	0.62	0.77	0.63	1.01	0.72	0.78	0.91	0.58	0.71	1.11	0.79	0.55
All Targets;T cells;T cell Activation;Th cells;Checkpoint	71	CTLA4	0.61	0.43	0.26	0.62	0.9	0.8	0.35	0.3	0.38	0.34	0.6	0.72	0.71	0.21	0.33	0.56	0.27	0.53	0.48	0.5	0.64	0.7	0.39	0.65	0.77	0.46	0.58	0.72	0.54	1.2	0.7	0.76	0.72	0.58
All Targets;T cells;Checkpoint	72	TIGIT	0.89	0.91	0.19	2.73	1.69	3.19	0.71	0.76	1.11	0.43	1.25	1.17	1.06	0.27	0.62	0.62	0.33	0.77	0.87	0.74	1.28	2.1	0.94	0.72	3.21	0.53	1.12	1.04	0.7	0.62	0.87	1.7	0.92	0.8
All Targets;Checkpoint	73	CD276	0.79	0.86	0.25	0.96	1.08	0.97	0.41	0.35	0.41	0.38	0.72	0.74	0.7	0.16	0.28	0.55	0.26	0.63	0.54	0.48	0.58	0.67	0.45	0.53	0.86	0.81	0.54	0.56	0.57	0.51	0.54	0.61	0.65	0.71
All Targets;Checkpoint	74	PDCD1LG2	0.71	0.69	0.14	1.06	1.05	1.11	0.71	0.47	1.1	0.35	0.73	0.87	0.92	0.57	0.49	0.48	0.32	0.56	0.73	0.72	0.64	0.67	0.47	0.69	0.62	0.65	0.54	0.69	2.35	0.45	0.59	0.69	0.67	0.57
All Targets;Proliferation	75	CCND1	0.69	0.66	0.33	0.82	0.9	0.93	0.34	0.33	0.31	0.26	0.94	0.7	0.57	0.14	0.24	0.44	0.19	0.55	0.34	0.52	0.5	0.79	0.43	0.58	0.77	0.54	1.02	0.72	0.5	0.67	0.66	0.8	0.73	0.72
All Targets;Proliferation	76	MKI67	0.44	0.49	0.13	0.7	0.75	0.89	0.35	0.27	0.41	0.26	0.43	0.53	0.61	0.14	0.33	0.5	0.2	0.35	0.39	0.37	0.45	0.55	0.32	0.59	0.53	0.36	0.42	0.51	0.49	0.83	0.42	0.38	0.41	0.44
All Targets;Tumor	77	AKT1	0.91	0.88	0.54	0.8	1.23	1.22	0.63	0.48	0.6	0.57	1.06	1.04	0.65	0.26	0.63	0.58	0.44	0.68	0.75	0.68	1.17	1.11	0.63	0.97	0.9	0.95	0.94	1.05	0.72	0.56	0.76	0.84	0.76	0.87
All Targets;Tumor	78	PTEN	1.08	1.08	0.28	0.66	1.12	1.09	0.41	0.3	0.33	0.33	0.95	1.07	0.73	0.26	0.53	0.57	0.35	0.42	0.53	0.56	1.09	0.71	0.77	0.86	1.27	0.83	0.9	0.79	0.59	0.65	0.45	0.53	0.56	0.87
All Targets;Tumor;Wnt Signaling	79	CTNNB1	0.98	0.88	0.34	0.89	0.92	1.17	0.53	0.48	0.63	0.4	0.92	0.8	0.68	0.25	0.55	0.72	0.38	0.85	0.63	0.79	0.85	0.79	0.52	0.58	0.77	0.62	0.92	0.81	0.74	0.58	0.75	0.67	0.89	0.99
All Targets;Wnt Signaling	80	DKK2	0.64	0.97	0.3	0.83	0.92	0.81	0.55	0.47	0.49	0.5	0.76	0.73	0.61	0.18	0.62	0.48	0.27	0.56	0.57	0.58	0.63	0.67	0.53	0.44	0.8	0.5	0.63	0.74	0.48	0.98	0.64	0.77	0.64	0.53
All Targets;Tumor;Epithelial	81	EPCAM	0.36	0.3	0.18	0.56	0.63	0.53	0.31	0.26	0.21	0.13	0.31	0.61	0.33	0.11	0.2	0.27	0.1	0.28	0.27	0.29	0.45	0.45	0.39	0.34	0.27	0.33	0.34	0.44	0.29	0.2	0.3	0.38	0.52	0.38
All Targets;Tumor;Epithelial	82	KRT	0.68	0.6	0.19	0.49	0.8	0.66	0.37	0.22	0.24	0.21	0.6	0.62	0.35	0.18	0.21	0.55	0.29	0.35	0.35	0.4	0.55	0.66	0.42	0.39	0.5	0.46	0.65	0.71	0.58	0.49	0.42	0.64	0.64	0.62
All Targets;Melanoma	83	pan-melanocyte	0.94	1.04	0.3	1.18	1.33	1.48	0.49	0.38	0.39	0.38	0.97	1.17	1.09	0.35	0.49	0.46	0.25	0.68	0.59	0.59	0.9	0.95	0.7	0.78	0.82	1.01	0.92	0.89	0.96	0.58	0.74	1.01	0.78	0.75
All Targets;Tumor;Apoptosis	84	BCL2	0.74	0.69	0.12	0.75	1.17	0.91	0.38	0.31	0.29	0.27	0.61	0.8	0.65	0.18	0.41	0.37	0.18	0.39	0.45	0.4	0.73	0.81	0.57	0.74	0.54	0.49	0.48	0.68	0.46	0.53	0.45	0.7	0.61	0.62
			FABP4+	FABP4+	FABP4+	FABP4+	FABP4+	FABP4+	FABP4+	FABP4+	FABP4+	FABP4+	FABP4+	FABP4+	FABP4+	FABP4+	FABP4+	FABP4+	FABP4+	FABP4+	FABP4+	FABP4+	FABP4+	FABP4+	FABP4+	FABP4+	FABP4+	FABP4+	Geometric Segment	Geometric Segment	Geometric Segment	Geometric Segment	Geometric Segment	Geometric Segment	Geometric Segment	Geometric Segment
			1	1	1	3	3	3	9	9	9	9	11	12	12	12	6	6	6	10	10	10	14	14	14	14	15	15	1	3	12	6	10	11	14	15
NORMALIZATION FOR HK GENES
All Targets;Background	1	NegPrb1	0.648352	0.680851	0.385965	0.469565	0.527778	0.35	0.614035	0.491803	0.483871	0.5	0.424242	0.352601	0.580645	0.516129	0.597015	0.0912281	0.75	0.573529	0.511905	0.534091	0.612903	0.673077	0.465753	0.303922	0.721154	0.72043	0.705263	0.518182	0.581633	1.10417	0.701493	0.738636	0.573171	0.9	All Targets;Background	1	NegPrb1
All Targets;Background	2	NegPrb2	0.274725	0.223404	0.298246	0.26087	0.3125	0.2125	0.210526	0.147541	0.241935	0.3	0.242424	0.0751445	0.27957	0.129032	0.253731	0.0701754	0.321429	0.308824	0.190476	0.215909	0.268817	0.182692	0.178082	0.0931373	0.153846	0.193548	0.273684	0.181818	0.214286	0.604167	0.298507	0.306818	0.426829	0.275	All Targets;Background	2	NegPrb2
All Targets;Background	3	NegPrb3	0.571429	0.723404	0.473684	1.14783	0.770833	1.175	0.964912	4.04918	0.806452	0.78	0.780303	0.739884	1.44086	1	0.492537	0.105263	0.928571	0.808824	0.761905	0.534091	1.04301	0.990385	1.09589	0.470588	0.644231	0.516129	0.557895	1.12727	0.704082	1.02083	0.820896	1.06818	1.12195	0.8125	All Targets;Background	3	NegPrb3
All Targets;Background	4	NegPrb4	0.604396	0.521277	0.175439	0.408696	0.340278	0.39375	1.03509	0.57377	0.677419	0.74	0.416667	0.33526	0.526882	0.387097	0.477612	0.147368	1.07143	0.823529	0.678571	0.681818	0.333333	0.413462	0.575342	0.279412	0.548077	0.494624	0.694737	0.445455	0.469388	1.5	1.07463	0.647727	0.621951	0.6	All Targets;Background	4	NegPrb4
All Targets;Background	5	NegPrb5	0.362637	0.255319	0.350877	0.391304	0.375	0.325	0.421053	0.262295	0.290323	0.32	0.272727	0.231214	0.44086	0.322581	0.313433	0.0245614	0.464286	0.308824	0.321429	0.363636	0.44086	0.519231	0.356164	0.22549	0.221154	0.322581	0.242105	0.527273	0.367347	0.5625	0.432836	0.420455	0.512195	0.35	All Targets;Background	5	NegPrb5
All Targets;Background	6	NegPrb6	0.945055	0.87234	1.61404	0.8	0.611111	0.5625	1.45614	1.47541	1.45161	1.82	0.681818	0.456647	0.967742	2.96774	1.35821	0.312281	3.25	1.27941	1.0119	0.965909	0.956989	0.759615	1.23288	0.401961	0.634615	0.870968	0.768421	0.772727	0.897959	1.64583	1.14925	0.965909	1.14634	0.975	All Targets;Background	6	NegPrb6
All Targets;Reference Gene	7	OAZ1	1.41758	1.46809	0.350877	1.04348	1.29167	0.7875	1.12281	0.836066	0.645161	0.7	0.893939	0.65896	1.12903	0.806452	0.880597	0.249123	1.46429	1.30882	0.928571	0.931818	1.60215	1.19231	1.05479	0.480392	1.38462	0.892473	1.05263	0.663636	0.632653	1.33333	0.761194	0.636364	1.4878	1.0375	All Targets;Reference Gene	7	OAZ1
All Targets;Reference Gene	8	POLR2A	0.571429	0.606383	0.315789	0.4	0.513889	0.54375	0.596491	0.459016	0.629032	0.6	0.439394	0.398844	0.731183	0.612903	0.462687	0.108772	1	0.602941	0.559524	0.556818	0.817204	0.759615	0.547945	0.279412	0.634615	0.344086	0.536842	0.572727	0.510204	1.20833	0.761194	0.568182	0.926829	0.5375	All Targets;Reference Gene	8	POLR2A
All Targets;Reference Gene	9	RAB7A	0.725275	0.957447	0.561404	0.704348	0.701389	0.65	0.824561	0.540984	0.548387	0.8	0.613636	0.485549	0.795699	0.580645	0.746269	0.17193	0.964286	0.838235	0.702381	0.829545	0.956989	0.567308	0.726027	0.29902	0.721154	0.473118	0.8	0.690909	0.765306	1.22917	0.910448	0.806818	0.963415	0.9375	All Targets;Reference Gene	9	RAB7A
All Targets;Reference Gene	10	SDHA	1	1	1	1	1	1	1	1	1	1	1	1	1	1	1	1	1	1	1	1	1	1	1	1	1	1	1	1	1	1	1	1	1	1	All Targets;Reference Gene	10	SDHA
All Targets;Reference Gene	11	UBB	3.03297	3.24468	1.54386	1.95652	2.79861	1.55625	1.73684	1.19672	1.16129	1.56	1.90152	1.31792	1.75269	1.90323	1.52239	0.466667	2.78571	2.70588	1.80952	1.84091	3.88172	2.05769	2.56164	0.691176	2.42308	2.13978	1.93684	0.972727	0.969388	1.52083	1.0597	0.977273	2.23171	2.6	All Targets;Reference Gene	11	UBB
All Targets;Cytokine & Chemokine Signaling	12	CCL5	0.527473	0.531915	0.614035	0.652174	0.506944	0.43125	0.807018	0.52459	0.725806	0.68	0.545455	0.323699	0.752688	0.483871	0.402985	0.161404	1	0.632353	0.547619	0.465909	0.494624	0.644231	0.671233	0.27451	0.586538	0.602151	0.557895	0.5	0.44898	0.6875	0.656716	0.511364	0.841463	0.55	All Targets;Cytokine & Chemokine Signaling	12	CCL5
All Targets;Cytokine & Chemokine Signaling	13	CMKLR1	0.912088	0.819149	0.45614	0.765217	0.6875	0.5875	0.824561	0.557377	0.709677	0.68	0.681818	0.306358	0.784946	0.709677	0.492537	0.150877	0.714286	0.647059	0.583333	0.556818	0.860215	0.740385	0.671233	0.27451	0.788462	0.526882	0.894737	0.727273	0.744898	1.47917	0.955224	0.659091	0.829268	0.9	All Targets;Cytokine & Chemokine Signaling	13	CMKLR1
All Targets;Cytokine & Chemokine Signaling	14	CXCL10	0.681319	0.574468	0.157895	0.895652	0.8125	0.725	0.701754	0.721311	0.548387	0.78	0.462121	0.479769	0.849462	0.709677	0.567164	0.133333	0.857143	0.705882	0.535714	0.534091	1.09677	0.894231	0.972603	0.392157	0.798077	0.731183	0.694737	0.9	1.03061	0.916667	0.761194	0.613636	0.939024	0.7625	All Targets;Cytokine & Chemokine Signaling	14	CXCL10
All Targets;Cytokine & Chemokine Signaling	15	CXCL9	0.604396	0.638298	0.298246	1.18261	1.09722	0.64375	0.964912	0.688525	0.774194	1	0.590909	0.722543	1.39785	0.774194	0.492537	0.182456	0.821429	0.897059	0.785714	0.670455	1.87097	0.682692	0.890411	0.465686	0.730769	0.612903	0.715789	0.9	0.846939	0.9375	0.80597	0.852273	0.841463	0.7875	All Targets;Cytokine & Chemokine Signaling	15	CXCL9
All Targets;Cytokine & Chemokine Signaling	16	CXCR6	0.681319	0.734043	0.22807	0.591304	0.534722	0.4625	0.666667	0.459016	0.483871	0.56	0.401515	0.398844	0.677419	0.677419	0.432836	0.178947	0.75	0.602941	0.607143	0.5	0.655914	0.721154	0.60274	0.259804	0.740385	0.473118	0.568421	0.781818	0.520408	0.958333	0.761194	0.909091	0.841463	0.6875	All Targets;Cytokine & Chemokine Signaling	16	CXCR6
All Targets;Cytokine & Chemokine Signaling	17	IL12B	0.43956	0.574468	0.245614	0.547826	0.569444	0.5	0.684211	0.47541	0.596774	0.8	0.363636	0.520231	0.752688	0.645161	0.328358	0.129825	0.821429	0.661765	0.47619	0.602273	0.827957	0.701923	0.671233	0.308824	0.711538	0.311828	0.336842	0.790909	0.418367	0.958333	0.746269	0.579545	0.865854	0.55	All Targets;Cytokine & Chemokine Signaling	17	IL12B
All Targets;Cytokine & Chemokine Signaling	18	IL15	0.879121	0.829787	0.421053	0.73913	0.513889	0.51875	0.947368	0.557377	0.677419	0.42	0.575758	0.387283	0.688172	0.806452	0.537313	0.129825	0.642857	0.794118	0.630952	0.568182	0.580645	0.701923	0.821918	0.308824	0.884615	0.623656	0.789474	0.736364	0.673469	1.02083	0.880597	0.670455	0.634146	0.9125	All Targets;Cytokine & Chemokine Signaling	18	IL15
All Targets;Cytokine & Chemokine Signaling	19	IL6	0.472527	0.595745	0.157895	0.834783	0.631944	0.6625	0.807018	0.639344	0.725806	0.78	0.348485	0.369942	0.731183	0.741935	0.701493	0.17193	0.785714	0.691176	0.642857	0.636364	0.709677	0.605769	0.780822	0.348039	0.701923	0.602151	0.568421	0.545455	0.44898	0.604167	0.656716	0.613636	0.804878	0.75	All Targets;Cytokine & Chemokine Signaling	19	IL6
All Targets;Cytokine & Chemokine Signaling	20	STAT1	0.692308	0.755319	0.45614	0.669565	0.493056	0.58125	0.912281	0.819672	0.887097	0.92	0.583333	0.375723	0.623656	0.580645	0.880597	0.326316	1.03571	1.05882	0.869048	0.75	0.55914	0.442308	0.534247	0.240196	0.423077	0.677419	0.694737	0.518182	0.510204	2.60417	1.20896	0.863636	0.756098	0.95	All Targets;Cytokine & Chemokine Signaling	20	STAT1
All Targets;Cytokine & Chemokine Signaling	21	STAT2	0.769231	0.712766	0.614035	0.652174	0.548611	0.39375	0.491228	0.47541	0.612903	0.48	0.55303	0.387283	0.806452	0.612903	0.507463	0.115789	0.785714	0.632353	0.5	0.386364	0.784946	0.548077	0.520548	0.318627	0.557692	0.494624	0.652632	0.481818	0.479592	0.833333	0.656716	0.681818	0.597561	0.75	All Targets;Cytokine & Chemokine Signaling	21	STAT2
All Targets;Cytokine & Chemokine Signaling	22	STAT3	0.758242	0.702128	0.140351	0.634783	0.673611	0.51875	0.754386	0.622951	0.677419	0.64	0.348485	0.50289	0.752688	0.645161	0.537313	0.136842	1.07143	0.720588	0.583333	0.602273	0.849462	0.596154	0.739726	0.284314	0.596154	0.516129	0.768421	0.681818	0.704082	1.29167	0.835821	0.647727	0.756098	0.925	All Targets;Cytokine & Chemokine Signaling	22	STAT3
All Targets;Apoptosis;Cytokine & Chemokine Signaling	23	FAS	0.406593	0.414894	0.263158	0.382609	0.506944	0.4625	0.333333	0.344262	0.322581	0.42	0.272727	0.219653	0.516129	0.419355	0.313433	0.0561404	0.5	0.352941	0.25	0.284091	0.569892	0.423077	0.246575	0.166667	0.326923	0.333333	0.347368	0.518182	0.316327	0.354167	0.343284	0.420455	0.682927	0.5125	All Targets;Apoptosis;Cytokine & Chemokine Signaling	23	FAS
All Targets;Apoptosis;Cytokine & Chemokine Signaling	24	TNF	0.714286	1.07447	0.403509	1.16522	1.13194	1.5125	1.49123	1.45902	0.919355	1	0.727273	0.936416	1.51613	1	0.343284	0.221053	0.964286	1.41176	0.97619	0.590909	1.01075	1.17308	0.890411	0.328431	0.625	0.591398	0.589474	1.06364	1.17347	1.02083	0.80597	0.75	2.08537	0.8625	All Targets;Apoptosis;Cytokine & Chemokine Signaling	24	TNF
All Targets;Interferon	25	IFNAR1	0.835165	0.723404	0.526316	0.565217	0.652778	0.6125	0.666667	0.491803	0.5	0.6	0.598485	0.601156	0.903226	0.645161	0.522388	0.182456	0.964286	0.602941	0.571429	0.568182	0.806452	0.769231	0.849315	0.401961	0.692308	0.591398	0.557895	0.827273	0.653061	0.979167	0.880597	0.693182	1.03659	0.8625	All Targets;Interferon	25	IFNAR1
All Targets;Interferon	26	IFNG	0.230769	0.106383	0.0877193	0.191304	0.125	0.225	0.210526	0.180328	0.177419	0.18	0.143939	0.179191	0.290323	0.225806	0.149254	0.0526316	0.25	0.205882	0.119048	0.204545	0.27957	0.211538	0.232877	0.0980392	0.115385	0.139785	0.210526	0.181818	0.204082	0.208333	0.253731	0.25	0.256098	0.2125	All Targets;Interferon	26	IFNG
All Targets;Interferon	27	IFNGR1	0.538462	0.43617	0.350877	0.373913	0.409722	0.31875	0.491228	0.327869	0.451613	0.28	0.340909	0.271676	0.451613	0.419355	0.298507	0.108772	0.535714	0.455882	0.392857	0.375	0.505376	0.528846	0.479452	0.151961	0.423077	0.344086	0.4	0.327273	0.27551	0.6875	0.402985	0.443182	0.439024	0.375	All Targets;Interferon	27	IFNGR1
All Targets;Cytokine & Chemokine Signaling	28	VEGFA	0.648352	0.712766	0.298246	0.573913	0.770833	0.7875	0.736842	0.52459	0.564516	0.62	0.386364	0.572254	0.655914	0.903226	0.552239	0.136842	1.03571	0.705882	0.583333	0.511364	1.04301	0.817308	0.726027	0.328431	0.461538	0.494624	0.568421	0.7	0.591837	1.97917	0.940299	0.704545	1.13415	0.7	All Targets;Cytokine & Chemokine Signaling	28	VEGFA
All Targets;Tumor;Cytokine & Chemokine Signaling	29	HIF1A	1.03297	0.87234	0.894737	0.747826	0.701389	0.55625	0.719298	0.672131	0.709677	0.66	0.69697	0.560694	0.849462	0.774194	0.686567	0.140351	0.785714	0.838235	0.75	0.693182	0.688172	0.663462	0.547945	0.29902	0.692308	0.72043	0.915789	0.663636	0.479592	1	0.820896	0.806818	0.573171	0.825	All Targets;Tumor;Cytokine & Chemokine Signaling	29	HIF1A
All Targets;Immune Cell Adhesion & Migration	30	ICAM1	0.769231	0.734043	0.403509	0.669565	0.583333	0.5875	0.912281	0.590164	0.532258	0.78	0.522727	0.439306	0.655914	0.548387	0.716418	0.133333	0.75	0.691176	0.595238	0.625	0.741935	0.557692	0.69863	0.284314	0.557692	0.516129	0.568421	0.718182	0.653061	1.1875	1.02985	0.647727	1.0122	0.75	All Targets;Immune Cell Adhesion & Migration	30	ICAM1
All Targets;Immune Cell Adhesion & Migration	31	ITGAM	0.516484	0.595745	0.45614	0.686957	0.548611	0.69375	0.859649	0.57377	0.709677	0.82	0.44697	0.456647	0.913978	0.516129	0.462687	0.129825	0.785714	0.588235	0.511905	0.511364	0.623656	0.836538	0.849315	0.289216	0.673077	0.462366	0.442105	0.518182	0.367347	1.14583	0.597015	0.784091	0.609756	0.55	All Targets;Immune Cell Adhesion & Migration	31	ITGAM
All Targets;Immune Cell Adhesion & Migration	32	ITGAV	0.758242	1.04255	0.842105	0.426087	0.5625	0.5125	0.719298	0.52459	0.66129	0.76	0.560606	0.375723	0.419355	0.387097	0.567164	0.108772	0.964286	0.867647	0.678571	0.579545	0.537634	0.528846	0.383562	0.259804	0.634615	0.892473	0.957895	0.509091	0.704082	1.04167	0.985075	0.920455	0.463415	0.975	All Targets;Immune Cell Adhesion & Migration	32	ITGAV
All Targets;Immune Cell Adhesion & Migration	33	ITGAX	0.747253	0.989362	0.666667	0.834783	0.798611	0.66875	0.754386	0.836066	0.693548	0.98	0.69697	0.549133	1	0.741935	0.477612	0.115789	1.10714	0.794118	0.630952	0.602273	0.763441	0.817308	0.671233	0.352941	0.711538	0.645161	0.821053	0.772727	0.683673	1	0.880597	0.795455	0.987805	0.7125	All Targets;Immune Cell Adhesion & Migration	33	ITGAX
All Targets;Immune Cell Adhesion & Migration	34	ITGB2	0.846154	0.946809	0.701754	0.765217	0.541667	0.5375	0.54386	0.377049	0.532258	0.62	0.530303	0.393064	0.645161	0.612903	0.447761	0.133333	0.964286	0.588235	0.488095	0.488636	0.698925	0.653846	0.465753	0.289216	0.682692	0.505376	0.757895	0.463636	0.530612	0.895833	0.656716	0.829545	0.695122	0.8	All Targets;Immune Cell Adhesion & Migration	34	ITGB2
All Targets;Immune Cell Adhesion & Migration	35	ITGB8	0.571429	0.606383	0.298246	0.6	0.673611	0.475	0.666667	0.491803	0.564516	0.54	0.598485	0.491329	0.827957	0.580645	0.522388	0.136842	0.928571	0.647059	0.428571	0.454545	0.849462	0.769231	0.657534	0.230392	0.576923	0.537634	0.852632	0.7	0.591837	1.20833	0.80597	0.806818	0.926829	0.95	All Targets;Immune Cell Adhesion & Migration	35	ITGB8
All Targets;Immune Cell Adhesion & Migration	36	PECAM1	0.857143	0.617021	0.122807	0.521739	0.486111	0.55625	0.842105	0.672131	0.83871	0.74	0.530303	0.364162	0.741935	0.709677	1.02985	0.34386	1.82143	0.838235	0.940476	0.818182	0.709677	0.644231	0.616438	0.210784	0.528846	0.526882	0.452632	0.5	0.642857	2.08333	1.13433	0.522727	0.743902	0.6	All Targets;Immune Cell Adhesion & Migration	36	PECAM1
All Targets;MHC2;Antigen Presentation	37	CD74	1.75824	1.75532	0.947368	0.869565	0.965278	0.93125	1.2807	0.885246	1.09677	1.2	1.17424	1.04046	1.55914	1.48387	1.77612	0.533333	2.78571	1.52941	1.96429	1.44318	3.07527	1.15385	1.12329	0.421569	1.32692	1.32258	1.07368	0.709091	0.94898	2.60417	1.46269	1.125	1.28049	1.75	All Targets;MHC2;Antigen Presentation	37	CD74
All Targets;MHC2;Antigen Presentation	38	HLA-DQ	1.1978	0.702128	0.192982	0.808696	0.993056	0.7375	0.964912	0.737705	0.919355	1.04	0.55303	0.439306	1.06452	0.774194	0.955224	0.217544	1.17857	1	0.845238	0.806818	0.967742	0.75	1.0274	0.426471	1	0.698925	0.663158	0.745455	0.55102	1.25	0.895522	0.727273	0.878049	0.775	All Targets;MHC2;Antigen Presentation	38	HLA-DQ
All Targets;MHC2;Antigen Presentation	39	HLA-DRB	1.15385	0.968085	0.298246	2.52174	1.77083	2.11875	1.05263	0.754098	1.03226	0.96	0.886364	1.58382	2.94624	2.48387	1.32836	0.315789	1.78571	1.5	1.32143	1.04545	3.30108	2.08654	1.94521	1.04412	0.653846	0.569892	1.08421	1.94545	1.16327	2.0625	1.50746	1.27273	2.39024	1.1625	All Targets;MHC2;Antigen Presentation	39	HLA-DRB
All Targets;Antigen Presentation	40	HLA-E	0.989011	0.680851	0.298246	0.834783	0.583333	0.45625	0.578947	0.442623	0.419355	0.52	0.712121	0.583815	0.83871	0.516129	0.567164	0.164912	1.03571	0.808824	0.654762	0.556818	0.989247	0.557692	0.712329	0.264706	0.605769	0.55914	0.515789	0.427273	0.408163	0.770833	0.552239	0.579545	0.536585	0.75	All Targets;Antigen Presentation	40	HLA-E
All Targets;Antigen Presentation	41	PSMB10	0.571429	0.585106	0.192982	0.956522	0.854167	0.69375	0.298246	0.393443	0.451613	0.46	0.409091	0.543353	0.763441	0.709677	0.223881	0.0912281	0.321429	0.676471	0.261905	0.397727	0.892473	0.701923	0.69863	0.544118	0.557692	0.462366	0.557895	0.718182	0.846939	0.625	0.462687	0.670455	0.780488	0.5625	All Targets;Antigen Presentation	41	PSMB10
All Targets;Tumor;Antigen Presentation	42	B2M	1.81319	1.71277	0.894737	1.71304	1.95139	1.4125	1.59649	1.16393	1.27419	1.7	1.31061	1.16763	1.63441	1.54839	2.53731	0.8	2.96429	2	1.79762	1.43182	3.65591	1.72115	1.80822	0.892157	1.24038	1.21505	1.45263	0.863636	0.959184	2.83333	1.28358	1.02273	1.89024	1.8625	All Targets;Tumor;Antigen Presentation	42	B2M
All Targets;T cell Activation;Myeloid;Checkpoint	43	CD86	0.989011	0.893617	0.22807	0.730435	0.569444	0.5625	0.754386	0.655738	0.645161	0.58	0.545455	0.508671	0.709677	0.774194	0.671642	0.168421	0.857143	0.764706	0.583333	0.522727	0.677419	0.730769	0.69863	0.343137	0.548077	0.483871	0.757895	0.918182	0.602041	1.3125	0.865672	0.75	0.878049	0.8625	All Targets;T cell Activation;Myeloid;Checkpoint	43	CD86
All Targets;M2 Macrophage;Myeloid Supression;Myeloid Activation;Macrophage;Myeloid	44	ARG1	0.604396	0.62766	0.263158	0.382609	0.506944	0.375	0.578947	0.409836	0.548387	0.58	0.378788	0.317919	0.569892	0.548387	0.358209	0.112281	0.821429	0.602941	0.535714	0.5	0.526882	0.673077	0.561644	0.215686	0.461538	0.494624	0.557895	0.609091	0.459184	1.27083	0.731343	0.75	0.95122	0.6625	All Targets;M2 Macrophage;Myeloid Supression;Myeloid Activation;Macrophage;Myeloid	44	ARG1
All Targets;Myeloid	45	CD47	0.714286	0.808511	0.508772	0.565217	0.597222	0.58125	0.473684	0.42623	0.33871	0.5	0.469697	0.462428	0.913978	0.677419	0.41791	0.147368	0.5	0.514706	0.428571	0.477273	0.731183	0.817308	0.780822	0.279412	0.605769	0.408602	0.821053	0.781818	0.469388	1.125	0.597015	0.670455	0.865854	0.9375	All Targets;Myeloid	45	CD47
All Targets;Myeloid Activation;Checkpoint	46	CD274	0.912088	0.87234	0.403509	0.6	0.520833	0.575	1.15789	1.11475	0.887097	1.36	0.643939	0.364162	0.709677	2.12903	1.20896	0.326316	3.42857	1.17647	0.904762	0.784091	0.731183	0.798077	1.08219	0.338235	0.673077	0.623656	0.757895	0.727273	0.540816	1.77083	0.970149	0.840909	1.32927	0.8	All Targets;Myeloid Activation;Checkpoint	46	CD274
All Targets;Myeloid Activation;Macrophage;Myeloid;Checkpoint	47	VSIR	0.450549	0.478723	0.245614	0.565217	0.625	0.4625	0.614035	0.393443	0.451613	0.4	0.477273	0.346821	0.677419	0.483871	0.373134	0.101754	0.857143	0.573529	0.392857	0.488636	0.55914	0.490385	0.506849	0.235294	0.596154	0.709677	0.389474	0.445455	0.5	0.770833	0.597015	0.659091	0.54878	0.575	All Targets;Myeloid Activation;Macrophage;Myeloid;Checkpoint	47	VSIR
All Targets;Myeloid Activation;Myeloid	48	CD40	0.56044	0.648936	0.105263	0.408696	0.5625	0.3625	0.45614	0.360656	0.451613	0.34	0.409091	0.283237	0.408602	0.387097	0.507463	0.108772	0.678571	0.588235	0.369048	0.454545	0.537634	0.432692	0.438356	0.220588	0.384615	0.526882	0.673684	0.372727	0.44898	0.895833	0.492537	0.568182	0.560976	0.625	All Targets;Myeloid Activation;Myeloid	48	CD40
All Targets;Myeloid Activation;Myeloid;Cytokine & Chemokine Signaling	49	CSF1R	0.285714	0.340426	0.192982	0.330435	0.326389	0.3	0.403509	0.229508	0.258065	0.32	0.318182	0.138728	0.376344	0.419355	0.283582	0.0701754	0.535714	0.308824	0.27381	0.272727	0.473118	0.278846	0.273973	0.147059	0.336538	0.354839	0.378947	0.363636	0.244898	0.458333	0.358209	0.329545	0.54878	0.4375	All Targets;Myeloid Activation;Myeloid;Cytokine & Chemokine Signaling	49	CSF1R
All Targets;Myeloid Supression;Myeloid	50	IDO1	0.945055	0.978723	0.438596	0.73913	0.590278	0.61875	1.07018	0.688525	0.854839	0.98	0.628788	0.427746	0.795699	0.774194	0.761194	0.224561	1.17857	1.07353	0.809524	0.647727	0.688172	0.807692	0.630137	0.333333	0.663462	0.83871	0.936842	0.772727	0.622449	2.02083	1.10448	0.840909	0.743902	1.0875	All Targets;Myeloid Supression;Myeloid	50	IDO1
All Targets;Myeloid;Checkpoint;B cells	51	ICOSLG	0.472527	0.56383	0.22807	0.704348	0.673611	0.6625	0.877193	0.590164	0.758065	0.62	0.356061	0.32948	1.21505	0.612903	0.701493	0.122807	1.03571	0.823529	0.654762	0.602273	0.935484	0.826923	0.767123	0.392157	0.480769	0.677419	0.494737	0.827273	0.642857	1.33333	0.925373	0.647727	0.963415	0.625	All Targets;Myeloid;Checkpoint;B cells	51	ICOSLG
All Targets;Total Immune	52	PTPRC	0.725275	0.521277	0.403509	0.817391	0.729167	0.55	0.736842	0.672131	0.580645	0.62	0.522727	0.49711	1.06452	0.580645	0.716418	0.168421	1.14286	0.705882	0.559524	0.568182	0.731183	0.798077	0.493151	0.333333	0.682692	0.301075	0.568421	0.654545	0.571429	0.75	0.910448	0.784091	0.804878	0.6875	All Targets;Total Immune	52	PTPRC
All Targets;DC	53	BATF3	0.879121	0.723404	0.561404	0.521739	0.486111	0.4625	0.982456	0.590164	0.612903	0.52	0.507576	0.433526	0.688172	0.645161	0.626866	0.168421	1	0.794118	0.666667	0.636364	0.602151	0.634615	0.452055	0.254902	0.586538	0.580645	0.431579	0.581818	0.530612	1.4375	0.895522	0.670455	0.731707	0.7125	All Targets;DC	53	BATF3
All Targets;Macrophage	54	CD68	0.703297	0.882979	0.578947	1.03478	1.09028	1.1	1.47368	0.95082	1.1129	1.18	0.530303	0.83815	1.21505	0.903226	1.19403	0.392982	1.64286	1.60294	1.07143	1	1.82796	1.42308	1.05479	0.504902	0.701923	0.526882	0.631579	0.845455	0.55102	1.60417	1.25373	0.909091	0.804878	0.775	All Targets;Macrophage	54	CD68
All Targets;T cells;Myeloid	55	LY6E	0.637363	0.659574	0.333333	0.469565	0.506944	0.4875	0.824561	0.606557	0.83871	0.94	0.454545	0.427746	0.526882	0.677419	1.25373	0.333333	1.85714	1.10294	1	0.931818	0.677419	0.528846	0.589041	0.215686	0.557692	0.365591	0.621053	0.581818	0.459184	1.54167	1.23881	0.647727	0.817073	0.65	All Targets;T cells;Myeloid	55	LY6E
All Targets;B cells	56	MS4A1	0.571429	0.56383	0.192982	0.678261	1.08333	0.7375	0.754386	0.557377	0.677419	0.6	0.666667	0.468208	0.870968	1.96774	0.61194	0.0982456	1	0.691176	0.607143	0.5	0.612903	0.769231	0.794521	0.313725	0.432692	0.462366	0.578947	0.827273	0.561224	1.25	0.835821	0.897727	0.902439	0.85	All Targets;B cells	56	MS4A1
All Targets;T cells	57	CD3E	0.494505	0.5	0.298246	0.469565	0.527778	0.54375	0.614035	0.377049	0.548387	0.54	0.348485	0.358382	0.806452	0.612903	0.41791	0.133333	0.928571	0.632353	0.583333	0.488636	0.72043	0.769231	0.821918	0.313725	0.394231	0.376344	0.452632	0.609091	0.5	1.0625	0.761194	0.522727	0.939024	0.7	All Targets;T cells	57	CD3E
All Targets;T cells;CD8 T cells	58	CD8A	0.615385	0.712766	0.22807	0.443478	0.513889	0.475	0.631579	0.590164	0.983871	0.54	0.575758	0.468208	0.580645	0.645161	0.567164	0.14386	1.07143	0.808824	0.547619	0.568182	0.548387	0.480769	0.616438	0.254902	0.682692	0.494624	0.736842	0.618182	0.602041	0.875	0.925373	0.806818	0.719512	0.7375	All Targets;T cells;CD8 T cells	58	CD8A
All Targets;T cells;Th cells;Myeloid	59	CD4	0.901099	1.62766	0.333333	1.2	0.868056	0.94375	1.17544	1.72131	1.16129	2.32	0.886364	0.693642	1.1828	1.83871	0.925373	0.185965	1.14286	1.08824	1.10714	0.943182	0.903226	0.961538	1.16438	0.372549	0.942308	0.913978	0.989474	0.736364	0.591837	1.625	1.34328	1.09091	1.13415	1.3	All Targets;T cells;Th cells;Myeloid	59	CD4
All Targets;T cells;Th cells;Tregs	60	FOXP3	0.417582	0.457447	0.333333	0.426087	0.409722	0.3125	0.491228	0.229508	0.354839	0.44	0.25	0.271676	0.612903	0.290323	0.283582	0.0701754	0.535714	0.426471	0.321429	0.295455	0.387097	0.307692	0.369863	0.147059	0.471154	0.408602	0.4	0.409091	0.326531	0.708333	0.41791	0.352273	0.47561	0.3375	All Targets;T cells;Th cells;Tregs	60	FOXP3
All Targets;T cell Activation	61	CD44	0.615385	0.414894	0.280702	0.947826	0.784722	0.81875	0.807018	0.639344	0.564516	0.64	0.44697	0.462428	1.01075	0.774194	0.522388	0.115789	0.964286	0.676471	0.738095	0.579545	1.2043	0.961538	0.876712	0.338235	0.519231	0.365591	0.6	0.890909	0.806122	1	0.820896	0.556818	1.17073	0.5125	All Targets;T cell Activation	61	CD44
All Targets;T cell Activation;Cytotoxicity	62	GZMB	0.494505	0.56383	0.385965	0.513043	0.479167	0.325	0.859649	0.360656	0.629032	0.6	0.484848	0.271676	0.548387	0.451613	0.38806	0.101754	0.75	0.573529	0.583333	0.522727	0.376344	0.471154	0.465753	0.20098	0.509615	0.387097	0.610526	0.472727	0.438776	0.666667	0.656716	0.545455	0.682927	0.5125	All Targets;T cell Activation;Cytotoxicity	62	GZMB
All Targets;Cytotoxicity	63	NKG7	0.615385	0.574468	0.263158	1.45217	0.763889	0.73125	1.08772	0.672131	0.903226	0.82	0.378788	0.49711	1.07527	0.580645	0.537313	0.136842	1.07143	0.705882	0.666667	0.636364	0.956989	0.951923	1.06849	0.269608	0.711538	0.419355	0.705263	0.809091	0.571429	0.875	0.701493	0.738636	1.18293	0.6375	All Targets;Cytotoxicity	63	NKG7
All Targets;Th cells	64	TBX21	0.626374	0.595745	0.350877	0.852174	0.701389	0.79375	0.824561	0.540984	0.483871	0.56	0.590909	0.520231	1.06452	0.677419	0.492537	0.14386	0.714286	0.617647	0.642857	0.522727	0.763441	0.673077	0.712329	0.343137	0.615385	0.516129	0.621053	0.809091	0.642857	0.770833	0.731343	0.795455	0.865854	0.9	All Targets;Th cells	64	TBX21
All Targets;T cells	65	CD40LG	0.802198	0.617021	0.333333	0.556522	0.5	0.475	0.526316	0.491803	0.66129	0.6	0.484848	0.393064	0.612903	0.548387	0.507463	0.185965	0.785714	0.514706	0.47619	0.534091	0.88172	0.548077	0.479452	0.289216	0.538462	0.387097	0.789474	0.636364	0.479592	1.72917	0.820896	0.875	0.939024	0.925	All Targets;T cells	65	CD40LG
All Targets;T cells;T cell Activation	66	CD27	0.43956	0.56383	0.245614	0.608696	0.5	0.5375	1.01754	0.639344	0.693548	0.52	0.462121	0.375723	0.580645	0.387097	0.328358	0.0982456	0.571429	0.720588	0.595238	0.443182	0.408602	0.451923	0.424658	0.127451	0.471154	0.526882	0.4	0.390909	0.428571	0.645833	0.597015	0.625	0.487805	0.5875	All Targets;T cells;T cell Activation	66	CD27
All Targets;T cells;T cell Activation	67	TNFRSF9	0.725275	0.851064	0.280702	0.826087	0.986111	0.61875	0.701754	0.52459	0.645161	0.62	0.628788	0.537572	0.88172	0.677419	0.58209	0.126316	0.928571	0.691176	0.595238	0.545455	0.870968	0.836538	0.794521	0.259804	0.615385	0.569892	0.736842	0.872727	0.632653	0.875	0.850746	0.738636	0.865854	0.725	All Targets;T cells;T cell Activation	67	TNFRSF9
All Targets;T cells;T cell Activation;Checkpoint	68	HAVCR2	0.945055	0.840426	0.315789	1	0.951389	0.90625	1.54386	1.01639	1	1.14	0.598485	0.693642	1.23656	1.06452	0.776119	0.126316	1.28571	1.04412	0.892857	0.988636	1.15054	1	1.10959	0.411765	0.586538	0.537634	0.684211	0.9	0.795918	1.29167	1.16418	0.897727	1.30488	0.825	All Targets;T cells;T cell Activation;Checkpoint	68	HAVCR2
All Targets;T cells;T cell Activation;Checkpoint	69	LAG3	0.659341	0.56383	0.649123	0.530435	0.409722	0.41875	1.57895	0.721311	0.967742	0.84	0.431818	0.427746	0.483871	0.451613	0.313433	0.147368	0.964286	0.705882	0.666667	0.647727	0.322581	0.548077	0.479452	0.186275	0.634615	0.655914	0.568421	0.581818	0.479592	1.29167	0.80597	0.522727	0.268293	0.6625	All Targets;T cells;T cell Activation;Checkpoint	69	LAG3
All Targets;T cells;T cell Activation;Checkpoint	70	PDCD1	0.769231	0.904255	0.526316	1.06957	0.75	0.70625	0.912281	0.786885	0.822581	0.98	0.515152	0.462428	7.03226	1.03226	0.716418	0.214035	1.07143	0.985294	0.702381	0.738636	0.774194	0.788462	0.849315	0.377451	0.605769	1.08602	0.757895	0.709091	0.928571	1.20833	1.0597	1.26136	0.963415	0.6875	All Targets;T cells;T cell Activation;Checkpoint	70	PDCD1
All Targets;T cells;T cell Activation;Th cells;Checkpoint	71	CTLA4	0.67033	0.457447	0.45614	0.53913	0.625	0.5	0.614035	0.491803	0.612903	0.68	0.454545	0.416185	0.763441	0.677419	0.492537	0.196491	0.964286	0.779412	0.571429	0.568182	0.688172	0.673077	0.534247	0.318627	0.740385	0.494624	0.610526	0.654545	0.55102	2.5	1.04478	0.863636	0.878049	0.725	All Targets;T cells;T cell Activation;Th cells;Checkpoint	71	CTLA4
All Targets;T cells;Checkpoint	72	TIGIT	0.978022	0.968085	0.333333	2.37391	1.17361	1.99375	1.24561	1.2459	1.79032	0.86	0.94697	0.676301	1.13978	0.870968	0.925373	0.217544	1.17857	1.13235	1.03571	0.840909	1.37634	2.01923	1.28767	0.352941	3.08654	0.569892	1.17895	0.945455	0.714286	1.29167	1.29851	1.93182	1.12195	1	All Targets;T cells;Checkpoint	72	TIGIT
All Targets;Checkpoint	73	CD276	0.868132	0.914894	0.438596	0.834783	0.75	0.60625	0.719298	0.57377	0.66129	0.76	0.545455	0.427746	0.752688	0.516129	0.41791	0.192982	0.928571	0.926471	0.642857	0.545455	0.623656	0.644231	0.616438	0.259804	0.826923	0.870968	0.568421	0.509091	0.581633	1.0625	0.80597	0.693182	0.792683	0.8875	All Targets;Checkpoint	73	CD276
All Targets;Checkpoint	74	PDCD1LG2	0.78022	0.734043	0.245614	0.921739	0.729167	0.69375	1.24561	0.770492	1.77419	0.7	0.55303	0.50289	0.989247	1.83871	0.731343	0.168421	1.14286	0.823529	0.869048	0.818182	0.688172	0.644231	0.643836	0.338235	0.596154	0.698925	0.568421	0.627273	2.39796	0.9375	0.880597	0.784091	0.817073	0.7125	All Targets;Checkpoint	74	PDCD1LG2
All Targets;Proliferation	75	CCND1	0.758242	0.702128	0.578947	0.713043	0.625	0.58125	0.596491	0.540984	0.5	0.52	0.712121	0.404624	0.612903	0.451613	0.358209	0.154386	0.678571	0.808824	0.404762	0.590909	0.537634	0.759615	0.589041	0.284314	0.740385	0.580645	1.07368	0.654545	0.510204	1.39583	0.985075	0.909091	0.890244	0.9	All Targets;Proliferation	75	CCND1
All Targets;Proliferation	76	MKI67	0.483516	0.521277	0.22807	0.608696	0.520833	0.55625	0.614035	0.442623	0.66129	0.52	0.325758	0.306358	0.655914	0.451613	0.492537	0.175439	0.714286	0.514706	0.464286	0.420455	0.483871	0.528846	0.438356	0.289216	0.509615	0.387097	0.442105	0.463636	0.5	1.72917	0.626866	0.431818	0.5	0.55	All Targets;Proliferation	76	MKI67
All Targets;Tumor	77	AKT1	1	0.93617	0.947368	0.695652	0.854167	0.7625	1.10526	0.786885	0.967742	1.14	0.80303	0.601156	0.698925	0.83871	0.940299	0.203509	1.57143	1	0.892857	0.772727	1.25806	1.06731	0.863014	0.47549	0.865385	1.02151	0.989474	0.954545	0.734694	1.16667	1.13433	0.954545	0.926829	1.0875	All Targets;Tumor	77	AKT1
All Targets;Tumor	78	PTEN	1.18681	1.14894	0.491228	0.573913	0.777778	0.68125	0.719298	0.491803	0.532258	0.66	0.719697	0.618497	0.784946	0.83871	0.791045	0.2	1.25	0.617647	0.630952	0.636364	1.17204	0.682692	1.05479	0.421569	1.22115	0.892473	0.947368	0.718182	0.602041	1.35417	0.671642	0.602273	0.682927	1.0875	All Targets;Tumor	78	PTEN
All Targets;Tumor;Wnt Signaling	79	CTNNB1	1.07692	0.93617	0.596491	0.773913	0.638889	0.73125	0.929825	0.786885	1.01613	0.8	0.69697	0.462428	0.731183	0.806452	0.820896	0.252632	1.35714	1.25	0.75	0.897727	0.913978	0.759615	0.712329	0.284314	0.740385	0.666667	0.968421	0.736364	0.755102	1.20833	1.1194	0.761364	1.08537	1.2375	All Targets;Tumor;Wnt Signaling	79	CTNNB1
All Targets;Wnt Signaling	80	DKK2	0.703297	1.03191	0.526316	0.721739	0.638889	0.50625	0.964912	0.770492	0.790323	1	0.575758	0.421965	0.655914	0.580645	0.925373	0.168421	0.964286	0.823529	0.678571	0.659091	0.677419	0.644231	0.726027	0.215686	0.769231	0.537634	0.663158	0.672727	0.489796	2.04167	0.955224	0.875	0.780488	0.6625	All Targets;Wnt Signaling	80	DKK2
All Targets;Tumor;Epithelial	81	EPCAM	0.395604	0.319149	0.315789	0.486957	0.4375	0.33125	0.54386	0.42623	0.33871	0.26	0.234848	0.352601	0.354839	0.354839	0.298507	0.0947368	0.357143	0.411765	0.321429	0.329545	0.483871	0.432692	0.534247	0.166667	0.259615	0.354839	0.357895	0.4	0.295918	0.416667	0.447761	0.431818	0.634146	0.475	All Targets;Tumor;Epithelial	81	EPCAM
All Targets;Tumor;Epithelial	82	KRT	0.747253	0.638298	0.333333	0.426087	0.555556	0.4125	0.649123	0.360656	0.387097	0.42	0.454545	0.358382	0.376344	0.580645	0.313433	0.192982	1.03571	0.514706	0.416667	0.454545	0.591398	0.634615	0.575342	0.191176	0.480769	0.494624	0.684211	0.645455	0.591837	1.02083	0.626866	0.727273	0.780488	0.775	All Targets;Tumor;Epithelial	82	KRT
All Targets;Melanoma	83	pan-melanocyte	1.03297	1.10638	0.526316	1.02609	0.923611	0.925	0.859649	0.622951	0.629032	0.76	0.734848	0.676301	1.17204	1.12903	0.731343	0.161404	0.892857	1	0.702381	0.670455	0.967742	0.913462	0.958904	0.382353	0.788462	1.08602	0.968421	0.809091	0.979592	1.20833	1.10448	1.14773	0.95122	0.9375	All Targets;Melanoma	83	pan-melanocyte
All Targets;Tumor;Apoptosis	84	BCL2	0.813187	0.734043	0.210526	0.652174	0.8125	0.56875	0.666667	0.508197	0.467742	0.54	0.462121	0.462428	0.698925	0.580645	0.61194	0.129825	0.642857	0.573529	0.535714	0.454545	0.784946	0.778846	0.780822	0.362745	0.519231	0.526882	0.505263	0.618182	0.469388	1.10417	0.671642	0.795455	0.743902	0.775	All Targets;Tumor;Apoptosis	84	BCL2
